# Supplementary material
Source: publisher figshare collection journal article supplement (https://acs.figshare.com/ndownloader/files/26737349)
Supplement: Supplementary file 1 [file 26737349]

# **A Thioether-Ligated Cupric Superoxide Model with Hydrogen Atom Abstraction Reactivity**

Mayukh Bhadra,<sup>‡</sup> Wesley J. Transue,<sup>ψ</sup> Hyeongtaek Lim,<sup>ψ</sup> Ryan E. Cowley,<sup>ψ</sup> Jung Yoon C. Lee,<sup>‡</sup> Maxime A. Siegler,<sup>‡</sup> Patrick Josephs,<sup>λ</sup> Gerald Henkel,<sup>λ</sup> Markus Lerch,<sup>ε</sup> Siegfried Schindler,<sup>ε</sup> Adam Neuba,<sup>λ</sup> Keith O. Hodgson,<sup>ψ,§</sup> Britt Hedman,<sup>§</sup> Edward I. Solomon<sup>ψ,§,\*</sup> and Kenneth D. Karlin<sup>‡,\*</sup>

<sup>‡</sup>Department of Chemistry, The Johns Hopkins University, Baltimore, Maryland 21218, United States

<sup>ψ</sup>Department of Chemistry, Stanford University, Stanford, California 94305, United States

<sup>λ</sup>Department of Chemistry, University of Paderborn, Paderborn D-33098, Germany

<sup>ε</sup>Institute of Inorganic and Analytical Chemistry, Justus-Liebig University of Gießen, Giessen D-35392, Germany

<sup>§</sup>Stanford Synchrotron Radiation Lightsource, SLAC National Accelerator Laboratory, Stanford University, Menlo Park, California 94025, United States

## **Contents :**

|                                                                                  |                |
|----------------------------------------------------------------------------------|----------------|
| <b>1. Materials, Methods and Instrumentation</b>                                 | <b>S2–S3</b>   |
| <b>2. Single Crystal X-Ray Crystallography</b>                                   | <b>S3–S5</b>   |
| <b>3. Oxygenation of LCu(I)B(C<sub>6</sub>F<sub>5</sub>)<sub>4</sub> Complex</b> | <b>S5–S6</b>   |
| <b>4. Thermodynamics of Dioxygen Binding</b>                                     | <b>S7–S9</b>   |
| <b>5. Cyclic Voltammetry (CV) Data</b>                                           | <b>S9–S10</b>  |
| <b>6. Resonance Raman Spectroscopy</b>                                           | <b>S10–S11</b> |
| <b>7. X-Ray Absorption Spectroscopy</b>                                          | <b>S11–S15</b> |
| <b>8. Density Functional Theory Computations</b>                                 | <b>S16–S23</b> |
| <b>9. Reactivity and Kinetic Studies</b>                                         | <b>S23–S30</b> |
| <b>10. Product Analyses</b>                                                      | <b>S30–S33</b> |
| <b>11. References</b>                                                            | <b>S34–S35</b> |

## 1. Materials, Methods and Instrumentation

All starting materials used were commercially available analytical grade from Sigma-Aldrich and TCI chemicals. Inhibitor-free 2-methyltetrahydrofuran (2-MeTHF) was purchased from Sigma-Aldrich, distilled under argon from sodium/benzophenone, and sparged with argon prior to use. Acetonitrile was stored under N<sub>2</sub> and purified via passage through 2 cm × 60 cm columns of activated alumina (Innovative Technologies Inc.). Pentane was freshly distilled from calcium hydride under an inert atmosphere and degassed prior to use. Acetone was distilled over regular Drierite (>99.5% CaSO<sub>4</sub>) under Ar and deoxygenated with Ar before use. Freshly distilled and Ar-sparged Acetonitrile and THF were stored in the glovebox over 3 Å activated molecular sieves and 2-MeTHF over 4 Å activated molecular sieves for at least 2 days prior to use. [Cu<sup>I</sup>(CH<sub>3</sub>CN)<sub>4</sub>]B(C<sub>6</sub>F<sub>5</sub>)<sub>4</sub>,<sup>1</sup> TMG<sub>3</sub>tren,<sup>2,3-5</sup> [(<sup>TMG3tren</sup>N<sub>4</sub>)Cu<sup>I</sup>]B(C<sub>6</sub>F<sub>5</sub>)<sub>4</sub> ([**2**]B(C<sub>6</sub>F<sub>5</sub>)<sub>4</sub>),<sup>6</sup> and TMG-N<sub>3</sub>S<sup>7</sup>, and TEMPO-H/D<sup>8-9</sup> were synthesized according to literature protocols, and their purities were verified by elemental analysis and/or <sup>1</sup>H NMR. For cyclic voltammetry, tetra-*n*-butylammonium hexafluorophosphate (TBAPF<sub>6</sub>) was recrystallized from ethanol before use. Synthesis and manipulations of copper salts were performed according to standard Schlenk techniques or in a VAC (Vacuum Atmospheres Company) glovebox (with O<sub>2</sub> and H<sub>2</sub>O levels below 1 ppm).

Bench-top low-temperature UV–visible experiments were carried out on a Cary Bio-50 spectrophotometer equipped with a liquid nitrogen chilled Unisoku USP-203-A cryostat using a 1 cm modified Schlenk cuvette. NMR spectroscopy was performed on Bruker 300 and 400 MHz instruments with spectra calibrated to either internal tetramethylsilane (TMS) standard or to a residual protio solvent.<sup>10</sup> EPR measurements were performed on an X-Band Bruker EMX CW EPR controlled with a Bruker ER 041 XG microwave bridge operating at X-band (~9 GHz) in 5

mm quartz EPR tubes cooled to 77 K in a finger Dewar (Wilmad). Single crystal X-ray Diffraction was performed on suitable crystals, which were mounted either on the tip of a glass fiber or on a loop with a tiny amount of Paratone-N oil and transferred to a N<sub>2</sub> cold stream (110(2) K).

$[(^{\text{TMG}}\text{N}_3\text{S})\text{Cu}^{\text{I}}]\text{B}(\text{C}_6\text{F}_5)_4$  (**[1]** $\text{B}(\text{C}_6\text{F}_5)_4$ ) was synthesized as follows: In a 250 ml Schlenk flask in the glove box, 157.9 mg (~0.41 mmol) of  $^{\text{TMG}}\text{N}_3\text{S}$  ligand (mol wt = 387.63 grams/mol) were dissolved in 7 mL of 2-MeTHF. 0.9 equivalents of  $[\text{Cu}^{\text{I}}(\text{CH}_3\text{CN})_4]\text{B}(\text{C}_6\text{F}_5)_4$  (336.2 mg, mol wt = 906.79 grams/mol) was added to the solution slowly, yielding a dark yellow solution which was allowed to stir for 5 min after which approximately 100 mL of degassed pentane were added to the copper(I) solution. The bilayered mixture was allowed to sit undisturbed overnight and the solvents were allowed to mix. The supernatant was then decanted and the pale-yellow oil was removed from the glove box and dried under vacuum for 10 min affording a semi-crystalline bright yellow powder which was further dissolved again in 2-MeTHF and recrystallization from pentane resulted in bright yellow crystals of diffraction quality (used for X-Ray crystallography) (87% yield). Elemental analysis: Calcd for  $\text{C}_{42}\text{H}_{41}\text{BCuF}_{20}\text{N}_7\text{S}$ : **C**, 44.63; **H**, 3.66; **N**, 8.68. Found: **C**, 44.60; **H**, 3.64; **N**, 7.95.

## 2. Single Crystal X-Ray Crystallography of **[1]** $\text{B}(\text{C}_6\text{F}_5)_4$

All reflection intensities were measured at 110(2) K using a SuperNova diffractometer (equipped with Atlas detector) with Cu  $K\alpha$  radiation ( $\lambda = 1.54178 \text{ \AA}$ ) under the program CrysAlisPro (Version 1.171.36.32 Agilent Technologies, 2013). The same program was used to refine the cell dimensions and for data reduction. The structure was solved with the program SHELXS-2014/7 (Sheldrick, 2015) and was refined on  $F^2$  with SHELXL-2014/7 (Sheldrick, 2015). Analytical numeric absorption correction using a multifaceted crystal model was applied using CrysAlisPro. The temperature of the data collection was controlled using the system Cryojel (manufactured by Oxford Instruments). The H atoms were placed at

calculated positions using the instructions AFIX 23 or AFIX 137 with isotropic displacement parameters having values 1.2 or 1.5  $U_{eq}$  of the attached C atoms. The structure is ordered.

**Table S1. Experimental details**

|                                                                            |                                                                                                                                                                                                                                                                                                                                                              |
|----------------------------------------------------------------------------|--------------------------------------------------------------------------------------------------------------------------------------------------------------------------------------------------------------------------------------------------------------------------------------------------------------------------------------------------------------|
|                                                                            | [1]B(C <sub>6</sub> F <sub>5</sub> ) <sub>4</sub>                                                                                                                                                                                                                                                                                                            |
| Crystal data                                                               |                                                                                                                                                                                                                                                                                                                                                              |
| Chemical formula                                                           | C <sub>24</sub> BF <sub>20</sub> ·C <sub>18</sub> H <sub>41</sub> CuN <sub>7</sub> S                                                                                                                                                                                                                                                                         |
| $M_r$                                                                      | 1130.23                                                                                                                                                                                                                                                                                                                                                      |
| Crystal system, space group                                                | Triclinic, <i>P</i> -1                                                                                                                                                                                                                                                                                                                                       |
| Temperature (K)                                                            | 110                                                                                                                                                                                                                                                                                                                                                          |
| $a, b, c$ (Å)                                                              | 13.7877 (3), 13.9488 (4), 25.8489 (5)                                                                                                                                                                                                                                                                                                                        |
| $\alpha, \beta, \gamma$ (°)                                                | 79.8825 (19), 81.9382 (18), 74.458 (2)                                                                                                                                                                                                                                                                                                                       |
| $V$ (Å <sup>3</sup> )                                                      | 4692.2 (2)                                                                                                                                                                                                                                                                                                                                                   |
| $Z$                                                                        | 4                                                                                                                                                                                                                                                                                                                                                            |
| Radiation type                                                             | Cu $K\alpha$                                                                                                                                                                                                                                                                                                                                                 |
| $\mu$ (mm <sup>-1</sup> )                                                  | 2.17                                                                                                                                                                                                                                                                                                                                                         |
| Crystal size (mm)                                                          | 0.50 × 0.12 × 0.05                                                                                                                                                                                                                                                                                                                                           |
| Data collection                                                            |                                                                                                                                                                                                                                                                                                                                                              |
| Diffractometer                                                             | SuperNova, Dual, Cu at zero, Atlas                                                                                                                                                                                                                                                                                                                           |
| Absorption correction                                                      | Analytical<br><i>CrysAlis PRO</i> , Agilent Technologies, Version 1.171.36.32 (release 02-08-2013 CrysAlis171 .NET) (compiled Aug 2 2013, 16:46:58) Analytical numeric absorption correction using a multifaceted crystal model based on expressions derived by R.C. Clark & J.S. Reid. (Clark, R. C. & Reid, J. S. (1995). <i>Acta Cryst.</i> A51, 887-897) |
| $T_{min}, T_{max}$                                                         | 0.579, 0.902                                                                                                                                                                                                                                                                                                                                                 |
| No. of measured, independent and observed [ $I > 2\sigma(I)$ ] reflections | 59936, 18322, 16042                                                                                                                                                                                                                                                                                                                                          |
| $R_{int}$                                                                  | 0.040                                                                                                                                                                                                                                                                                                                                                        |
| $(\sin \theta/\lambda)_{max}$ (Å <sup>-1</sup> )                           | 0.616                                                                                                                                                                                                                                                                                                                                                        |
| Refinement                                                                 |                                                                                                                                                                                                                                                                                                                                                              |
| $R[F^2 > 2\sigma(F^2)], wR(F^2), S$                                        | 0.038, 0.105, 1.03                                                                                                                                                                                                                                                                                                                                           |
| No. of reflections                                                         | 18322                                                                                                                                                                                                                                                                                                                                                        |

|                                                             |                               |
|-------------------------------------------------------------|-------------------------------|
| No. of parameters                                           | 1315                          |
| H-atom treatment                                            | H-atom parameters constrained |
| $\Delta\rho_{\max}, \Delta\rho_{\min}$ (e Å <sup>-3</sup> ) | 0.55, -0.56                   |

Computer programs: *CrysAlis PRO*, Agilent Technologies, Version 1.171.36.32 (release 02-08-2013 CrysAlis171 .NET) (compiled Aug 2 2013, 16:46:58), *SHELXS2014/7* (Sheldrick, 2015), *SHELXL2014/7* (Sheldrick, 2015), *SHELXTL* v6.10 (Sheldrick, 2008)

Reference: Sheldrick, G. M. (2015). *Acta Cryst.* C71, 3-8.

### 3. Oxygenation of [1]B(C<sub>6</sub>F<sub>5</sub>)<sub>4</sub> to form [1·O<sub>2</sub>]B(C<sub>6</sub>F<sub>5</sub>)<sub>4</sub>

In a general procedure, a stock solution of 2.0 mM [1]B(C<sub>6</sub>F<sub>5</sub>)<sub>4</sub> was made by dissolving the solid complex in 2-MeTHF in a scintillation vial in the glovebox. This was further diluted to 0.4 mM and 2.5 ml of this solution was transferred in a Schlenk cuvette via syringe, capped with septum, secured with parafilm, and taken out of the glovebox. The cuvette was allowed to cool to −135 °C in the cryostat of the UV–Vis spectrophotometer for 15 min and then dioxygen was gently bubbled through a metallic needle. Dioxygen was bubbled over 5–6 minutes in intervals of 30 s, giving full conversion to [1·O<sub>2</sub>]B(C<sub>6</sub>F<sub>5</sub>)<sub>4</sub>. At this point, the spectrum was recorded (Figure S1). The solution containing [1·O<sub>2</sub>]<sup>+</sup> was subjected to vacuum–argon cycles and Ar-bubbling to remove excess O<sub>2</sub> and subsequently warmed up to room temperature following which the cuvette was cooled back to −135 °C and the spectrum was recorded while cooling. Figure S2 depicts the reversible regeneration of [1·O<sub>2</sub>]<sup>+</sup>. The blue spectrum (Figure S1) corresponds to the warmed-up RT product which reversibly binds the released O<sub>2</sub> from the cuvette-headspace over a period of ~10 minutes upon gradual cooling of the solution back to −135 °C. Comparison of the 442 nm absorbance (green spectrum of Figures S1 and S2) indicates ~95% regeneration of [1·O<sub>2</sub>]<sup>+</sup>.

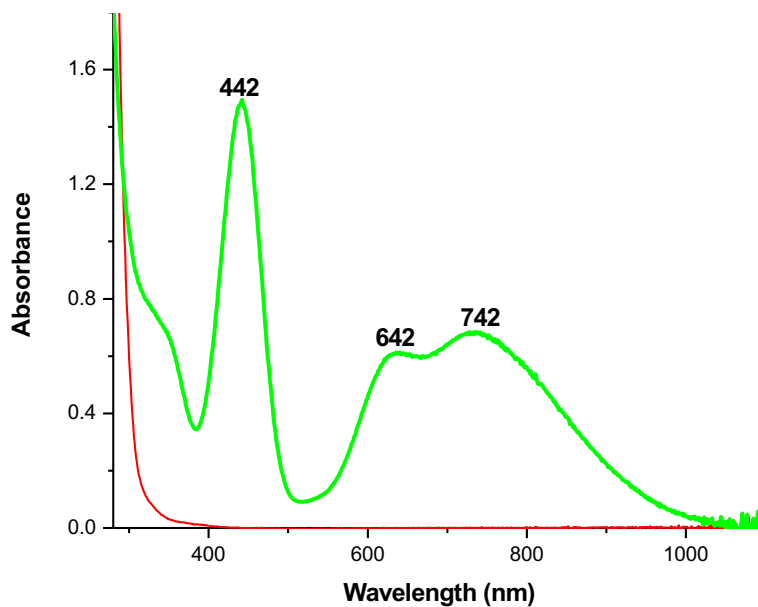

**Figure S1.** Generation of  $[1\cdot O_2]B(C_6F_5)_4$  features (green spectrum) from the  $Cu^I$  precursor (red spectrum), 0.4 mM solution of  $[1]B(C_6F_5)_4$ , upon dioxygen addition at  $-135\text{ }^\circ\text{C}$ .

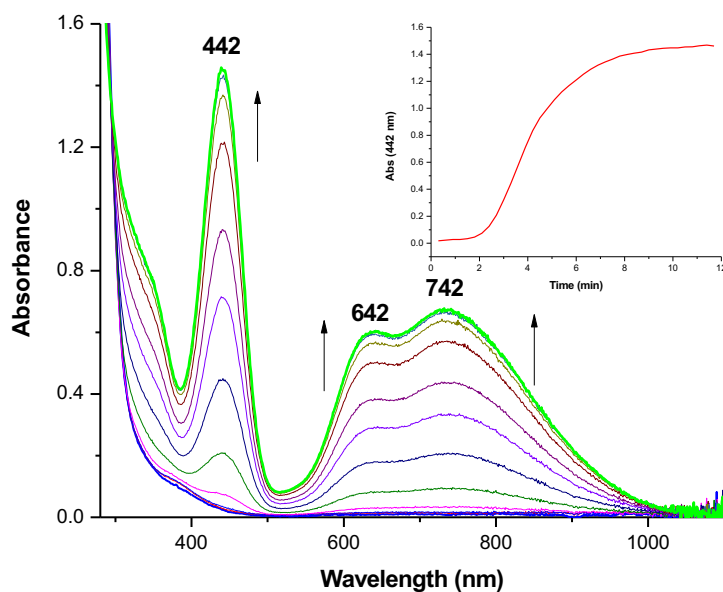

**Figure S2.** Reversible regeneration of  $[1\cdot O_2]B(C_6F_5)_4$  features (green spectrum) from the warmed up solution at RT (blue spectrum), upon re-cooling back to  $-135\text{ }^\circ\text{C}$ ; (inset) time trace of the growth of the 442 nm band of  $[1\cdot O_2]B(C_6F_5)_4$ , as recorded while gradual cooling of the experimental setup to  $-135\text{ }^\circ\text{C}$ .

#### 4. Thermodynamics of Dioxygen Binding

In a cuvette, a 2.5 ml 2-MeTHF solution of  $[1]B(C_6F_5)_4$  was taken and excess dioxygen gas was bubbled through a metallic needle in the pre-chilled cuvette in the cryostat. After the full formation of  $[1 \cdot O_2]^+$ , the headspace and the solution were purged with alternating vacuum and argon cycles. Starting from the lowest temperature, the cuvette was slowly warmed up at increments of 5–10 °C, the headspace  $O_2$  was carefully equilibrated to 1 atm pressure via a mineral oil bubbler and the solution was kept at each temperature for ~15 min, and then the spectra are recorded. Figure **3a** in the main manuscript summarizes the spectral change corresponding to the decay of  $[1 \cdot O_2]^+$  over a range of –145 to –85 °C.

The temperature-dependent absorbance at 740 nm is plotted in Figure **3b** (orange plot) in the main manuscript. Slowly warming a solution of  $[1 \cdot O_2]^+$  saturated with  $O_2$  (–145 to –85 °C) allowed quantification of  $[1 \cdot O_2]^+$  at several temperatures. At –125 °C, ca. 50% remained and no  $[1 \cdot O_2]^+$  was observed above –90 °C. Analogous measurements on  $[2 \cdot O_2]B(C_6F_5)_4$  (–85 to +15 °C) generated from  $[2]B(C_6F_5)_4$  were carried out and the spectral changes are shown in Figure **S3** below, revealing the inflection point of the curve to be ca. –40 °C (Figure **3b** (blue plot) in the main text).

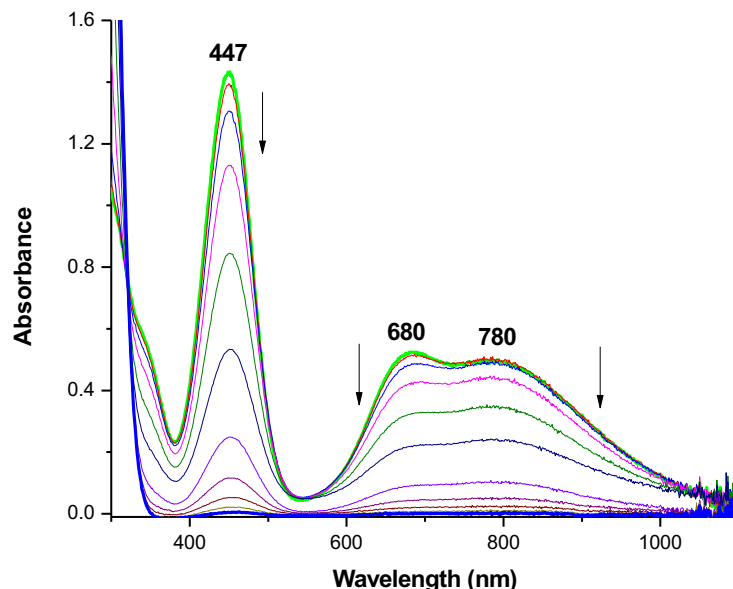

**Figure S3.** Decay of the  $[2\cdot\text{O}_2]^+$  features upon incremental warming of the superoxide solution from  $-85\text{ }^\circ\text{C}$  (green spectrum) to  $+15\text{ }^\circ\text{C}$  (blue spectrum). The temperature-dependent absorbance at  $740\text{ nm}$  is plotted in Figure 3b (blue plot) in the main text.

The relative thermodynamics of dioxygen binding by  $[1]\text{B}(\text{C}_6\text{F}_5)_4$  and  $[2]\text{B}(\text{C}_6\text{F}_5)_4$  were quantified by fitting the variable temperature UV–Vis data at  $740\text{ nm}$  for superoxide formation. This wavelength was selected because it is positioned centrally within the ligand field transitions of both  $[1\cdot\text{O}_2]^+$  and  $[2\cdot\text{O}_2]^+$ . Additionally, it avoids the  $\sim 680\text{ nm}$  region, as the  $680\text{ nm}$  band of  $[2\cdot\text{O}_2]^+$  appears to narrow slightly at the lowest temperatures measured. Such a lineshape change would skew single-wavelength fits. Similar fits to those at  $740\text{ nm}$  are obtained at  $447$  and  $780\text{ nm}$  wavelengths.

The relation between equilibrium constant  $K_{eq} = \frac{[\text{CuO}_2]}{[\text{Cu}][\text{O}_2]}$  and free energy is  $\Delta G = \Delta H - T\Delta S = -RT \ln K_{eq}$ , where  $[\text{CuO}_2]$  is the concentration of the superoxide complex  $[1\cdot\text{O}_2]^+$  or  $[2\cdot\text{O}_2]^+$ ,  $[\text{Cu}]$  the concentration of the cuprous complex  $[1]^+$  or  $[2]^+$ ,  $[\text{O}_2]$  the concentration of dissolved oxygen,  $\Delta H$  the enthalpy change,  $\Delta S$  the entropy change,  $R$  the gas constant, and  $T$  the temperature.



Application of balance allows conversion into  $[\text{CuO}_2] = \frac{[\text{Cu}]_{\text{initial}}}{1 + \exp\left(\frac{\Delta H - T\Delta S}{RT}\right)/[\text{O}_2]}$ , where  $[\text{Cu}]_{\text{initial}}$  is the initial concentration of  $[\mathbf{1}]^+$  or  $[\mathbf{2}]^+$  before  $\text{O}_2$  introduction. Accurate  $\text{O}_2$  solubility data for 2-MeTHF are lacking, so we instead assume it follows Henry's law, giving  $[\text{O}_2] = \mathcal{H}_0 \exp\left[-\frac{\Delta H_{\text{sol}}}{R}\left(\frac{1}{T} - \frac{1}{T_0}\right)\right]$  for a reference solubility  $\mathcal{H}_0$  at some reference temperature  $T_0$  and enthalpy of dissolution  $\Delta H_{\text{sol}}$ . Combination of everything with Beer's law gives the superoxide absorption to be  $A_{\text{CuO}_2} = \frac{\alpha}{1 + \exp(\beta + \gamma/T)}$ , where  $\alpha = \epsilon l[\text{CuO}_2]$  for extinction coefficient  $\epsilon$  (740 nm) and cuvette path length  $l$ ,  $\beta = -\ln \mathcal{H}_0 - \frac{\Delta S}{R} - \frac{\Delta H_{\text{sol}}}{RT_0}$ , and  $\gamma = -\frac{\Delta H_{\text{sol}}}{R}$ . By comparing fitted values of composite variables “ $\beta$ ” and “ $\gamma$ ”, we obtain relative enthalpic ( $\Delta\Delta H = +3.2$  kcal/mol) and entropic ( $\Delta\Delta S = +3.7$  cal/mol K) thermodynamics. The fits are shown in Figure **3b** of the main manuscript.

## 5. Cyclic Voltammetry (CV) Data

All cyclic voltammograms were collected under an inert argon atmosphere in dry and degassed 17:3 2-MeTHF:Acetone at 25 °C (**Note:** The acetone was necessary to dissolve TBAPF<sub>6</sub>, which did not dissolve in neat 2-MeTHF). The concentration of the cuprous complexes ( $[\mathbf{1}]^+$  or  $[\mathbf{2}]^+$ ) was ~1.0 mM, with TBAPF<sub>6</sub> used as the supporting electrolyte (0.1 M concentration). A three-electrode system was used as follows: Ag/AgNO<sub>3</sub> (10 mM) in CH<sub>3</sub>CN as reference electrode; glassy carbon electrode as the working electrode; platinum wire as the counter electrode. All reduction potentials were referenced vs.  $\text{Fc}^{+/0}$  as an external standard under the same conditions. The data obtained are shown in Figure **3c** in the main manuscript.

A similar analysis was performed by dissolving the complexes ( $[1]^+$  or  $[2]^+$ ) in the “more-coordinating”  $\text{CH}_3\text{CN}$  solvent and the data obtained are shown below in Figure S4.

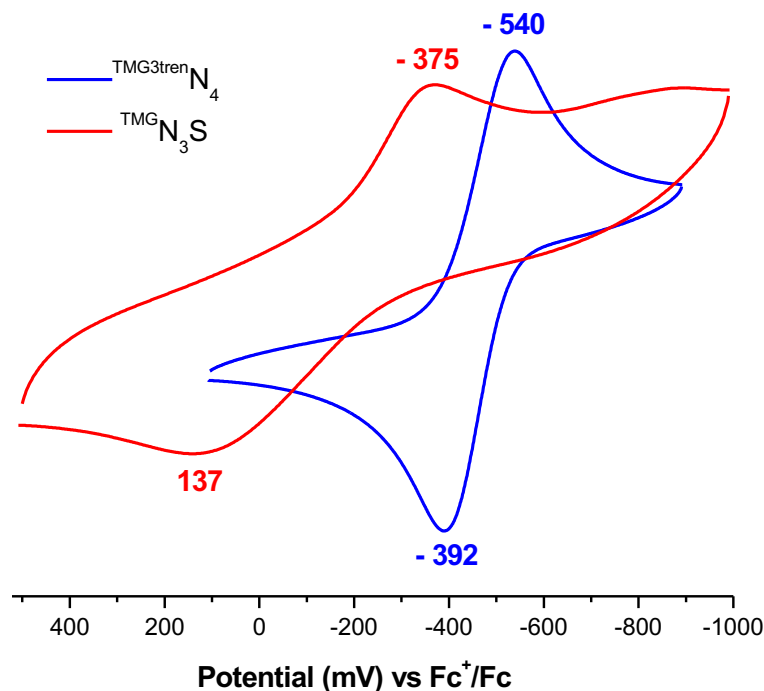

**Figure S4.** Cyclic voltammograms of the  $[(\text{L})\text{Cu}^{\text{I}}]\text{B}(\text{C}_6\text{F}_5)_4$  complexes in MeCN at room temperature under Ar atmosphere. In red is depicted the voltammogram of  $\text{Cu}^{\text{II}}/\text{Cu}^{\text{I}}$  couple for  $[1]^+/[1]^{2+}$  ( $\text{L} = \text{TMG-N}_3\text{S}$ ) and in blue that for  $[2]^+/[2]^{2+}$  ( $\text{L} = \text{TMG}_3\text{tren}$ ). All reduction potentials were referenced vs.  $\text{Fc}^{+/0}$  as an external standard under the same conditions as the  $[(\text{L})\text{Cu}^{\text{I}}]\text{B}(\text{C}_6\text{F}_5)_4$  complexes.

## 6. Resonance Raman Spectroscopy

For resonance Raman (rRaman) measurements, a  $\sim 1.0$  mM stock solution of  $[1]\text{B}(\text{C}_6\text{F}_5)_4$  was prepared in 2-MeTHF in the glovebox. A 500  $\mu\text{L}$  aliquot of this copper(I) solution was added to a 5 mm NMR sample tube, capped with a septum, and chilled in a 2-MeTHF/ $\text{N}_2(l)$  bath. Oxygenation of the copper samples was achieved by slowly bubbling an excess of dioxygen through the solution

using a Hamilton gas-tight syringe equipped with a three-way valve and needle outlet. Dioxygen,  $^{16}\text{O}_2$  (Airgas OX UHP-300) or  $^{18}\text{O}_2$  (Icon 6393), was added to an evacuated Schlenk flask fitted with a septum for the oxygenation reactions described above. rRaman samples were excited at 413.1 nm using a Coherent I90C-K  $\text{Kr}^+$  ion laser while the sample was immersed in a liquid nitrogen-cooled (77 K) EPR finger dewar (Wilmad). Power was measured at the sample as 10 mW. Data were recorded while manually rotating the sample to minimize photodecomposition. The spectra were recorded using a Spex 1877 CP triple monochromator with either a 600, 1200, or 2400 grooves/mm holographic spectrograph grating, and detected by an Andor Newton CCD cooled to  $-80^\circ\text{C}$ . Spectra were calibrated on the energy axis to an external sample of toluene at room temperature. Peak positions were determined from fitting the experimental data with Gaussian transitions using Peakfit Version 4. Figure 3d in the main text shows the rRaman data obtained for  $[\mathbf{1}\cdot\text{O}_2]\text{B}(\text{C}_6\text{F}_5)_4$  with both natural abundance  $^{16}\text{O}_2$  and  $^{18}\text{O}_2$ .

## 7. X-Ray Absorption Spectroscopy

The Cu K-edge X-ray absorption spectroscopy (XAS) data were collected at the Stanford Synchrotron Radiation Lightsource (SSRL) on the unfocused 20-pole, 2 T wiggler side-station beam line 7-3 under storage ring parameters of 3 GeV and  $\sim 500$  mA. A Si(220) double-crystal monochromator was used for energy selection. The  $\text{M}_0$  mirror was not employed and the monochromator was detuned by  $\sim 50\%$  to remove contributions from higher harmonics. The 2-MeTHF solutions of  $[\mathbf{1}]\text{B}(\text{C}_6\text{F}_5)_4$  and  $[\mathbf{1}\cdot\text{O}_2]\text{B}(\text{C}_6\text{F}_5)_4$  were loaded into delrin XAS cells with 38  $\mu\text{m}$  Kapton windows and stored in liquid  $\text{N}_2$ . During data collection, the samples were maintained at a constant temperature of  $\sim 10$  K using an Oxford Instruments CF 1208 liquid helium cryostat. A Canberra 30-element Ge solid-state detector and soller slits equipped with a Ni filter were used

to collect Cu K $\alpha$  fluorescence data. Internal energy calibration was accomplished by simultaneous measurement of the absorption of a Cu foil placed between two ionization chambers situated after the sample. The first inflection point of the foil spectrum was assigned to 8980.3 eV. The extended X-ray absorption fine structure (EXAFS) data are reported to  $k = 12.8 \text{ \AA}^{-1}$  to avoid interference from the Zn K-edge. Over the course of data collection, [1]B(C<sub>6</sub>F<sub>5</sub>)<sub>4</sub> did not show photodamage, while photoreduction was observed for [1·O<sub>2</sub>]B(C<sub>6</sub>F<sub>5</sub>)<sub>4</sub>. Thus, only the first scans from the fresh sample spots were used for the final average data of [1·O<sub>2</sub>]B(C<sub>6</sub>F<sub>5</sub>)<sub>4</sub>. The data presented here include an average of 24 scans and 19 scans for [1]B(C<sub>6</sub>F<sub>5</sub>)<sub>4</sub> and [1·O<sub>2</sub>]B(C<sub>6</sub>F<sub>5</sub>)<sub>4</sub>, respectively.

Background subtraction and normalization of the data were performed using PySpline.<sup>11</sup> The data were processed by fitting a second-order polynomial to the pre-edge region and subtracting this from the entire spectrum as a background. A three-region spline of orders 2, 3, and 3 was used to model the smoothly decaying post-edge region. The data were normalized by scaling the spline function to an edge jump of 1.0 at 9000 eV. The EXAFS curve-fitting analysis program OPT in EXAFSPAK (George, G. N. Stanford Synchrotron Radiation Laboratory: Stanford, CA, 2000) was used to fit the EXAFS data. The theoretical phase and amplitude functions were generated by FEFF (version 7.0).<sup>12</sup> Starting structural models were obtained from the DFT optimized structures. During the fitting process, the bond distance ( $R$ ) and the mean-square thermal and static deviation in  $R$  ( $\sigma^2$ ), which is related to the Debye-Waller factor, were allowed to vary. The threshold energy ( $E_0$ ), the point at which the photoelectron wave vector  $k$  is 0, was also allowed to vary but was constrained as a common value for all components in a given fit. The amplitude reduction factor ( $S_0^2$ ) was fixed to a value of 1.0 and the coordination number (CN) were systematically varied to achieve the best fit to the EXAFS data and their Fourier transforms.

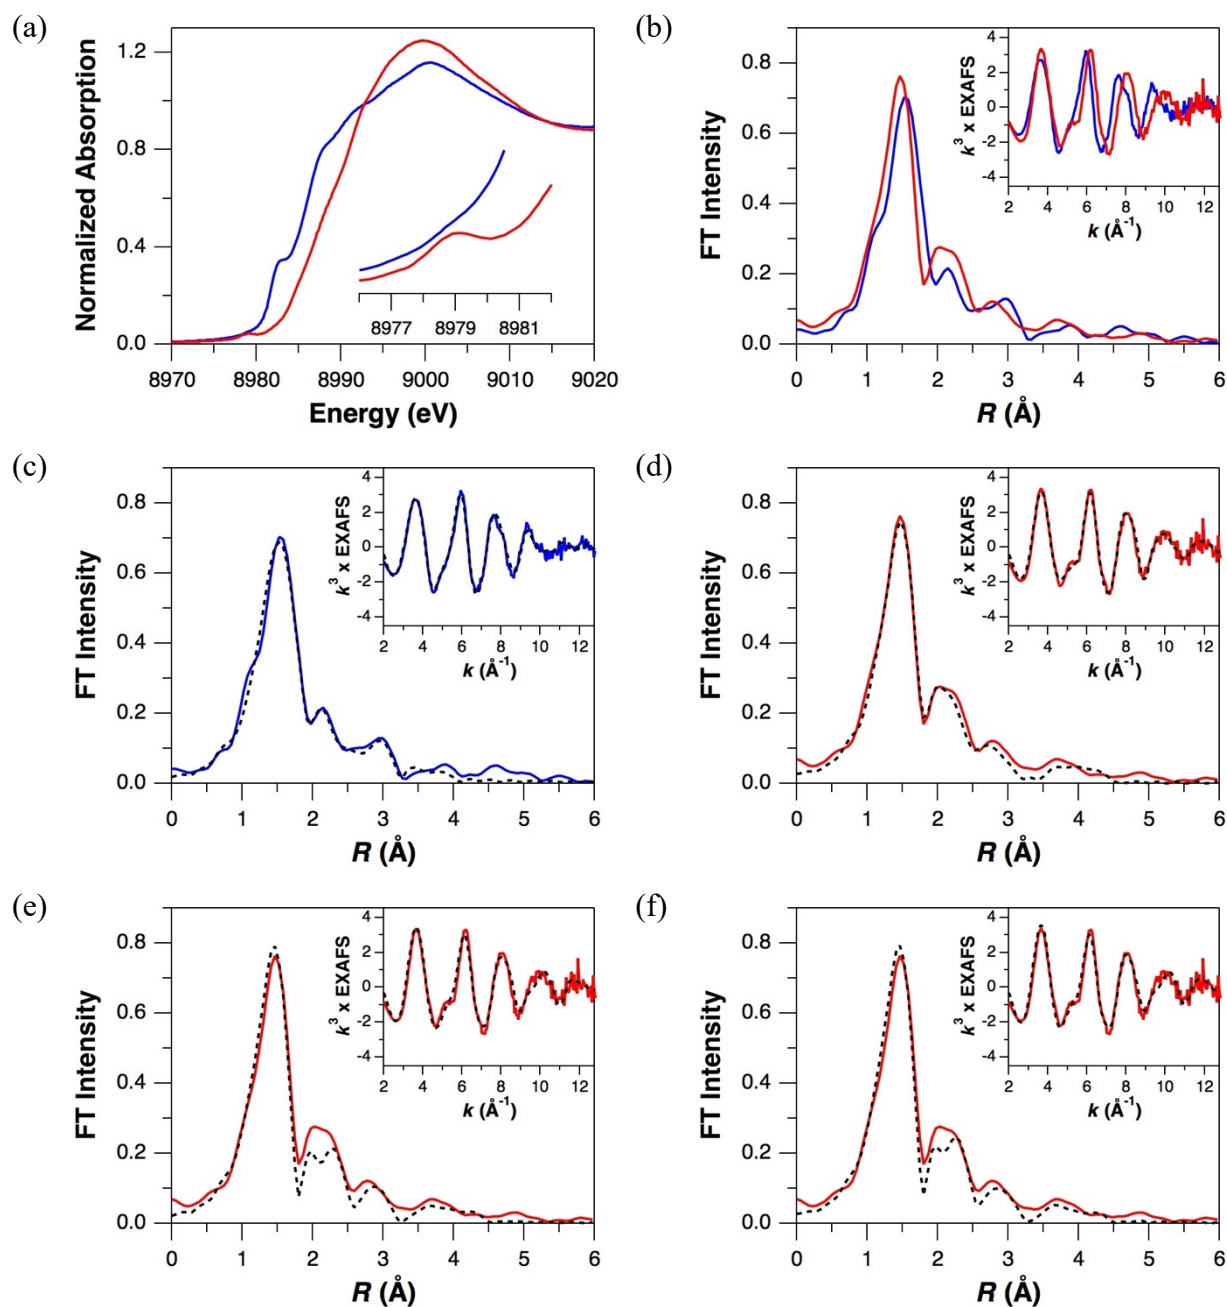

**Figure S5.** XAS studies on  $[1]B(C_6F_5)_4$  (blue) and  $[1 \cdot O_2]B(C_6F_5)_4$  (red). (a) Cu K-edge XAS spectra of both compounds with an inset showing the expanded pre-edge region. (b) Comparison of Cu K-edge EXAFS data (inset) and non-phase-shift-corrected Fourier transforms. (c, d) Best fits for EXAFS data (data solid, fit dashed). (e, f) Fits for  $[1 \cdot O_2]B(C_6F_5)_4$  replacing the Cu-S interaction by (e) Cu-C or (f) Cu-O (data solid, fit dashed).

**Table S2. Best Fits for the Cu K-edge EXAFS Data**

| Complex                                                           | CN/Path <sup>a</sup> | $R$ (Å) <sup>b</sup> | $\sigma^2$ (Å <sup>2</sup> ) <sup>c</sup> | $\Delta E_0$ (eV) | Error $F$ <sup>d</sup> |
|-------------------------------------------------------------------|----------------------|----------------------|-------------------------------------------|-------------------|------------------------|
| [1]B(C <sub>6</sub> F <sub>5</sub> ) <sub>4</sub>                 | 3 Cu-N/O             | 2.01                 | 824                                       | -13.64            | 0.17                   |
|                                                                   | 1 Cu-S               | 2.26                 | 651                                       |                   |                        |
|                                                                   | 10 Cu-N-C            | 3.22                 | 822                                       |                   |                        |
|                                                                   | 4 Cu-C/N             | 3.45                 | 839                                       |                   |                        |
|                                                                   | 6 Cu-N/C-N/C         | 4.31                 | 934                                       |                   |                        |
| [1·O <sub>2</sub> ]B(C <sub>6</sub> F <sub>5</sub> ) <sub>4</sub> | 4 Cu-O/N             | 1.98                 | 943                                       | -9.68             | 0.21                   |
|                                                                   | 1 Cu-S               | 2.55                 | 1171                                      |                   |                        |
|                                                                   | 14 Cu-N-C            | 3.29                 | 504                                       |                   |                        |
|                                                                   | 6 Cu-N/C-N/C         | 4.29                 | 927                                       |                   |                        |
|                                                                   | 16 Cu-N/C-N/C        | 4.66                 | 495                                       |                   |                        |

<sup>a</sup>CN is coordination number. <sup>b</sup>The estimated standard deviations in  $R$  are  $\pm 0.02$  Å. <sup>c</sup>The  $\sigma^2$  values are multiplied by  $10^5$ . <sup>d</sup>The error  $F$  is given by  $[\sum k^6(\chi_{\text{exptl}} - \chi_{\text{calcd}})^2 / \sum k^6 \chi_{\text{exptl}}^2]^{1/2}$ . Errors in coordination numbers are  $\pm 25\%$  and those in the identity of the scatterer  $Z$  are  $\pm 1$ .

**Table S3. EXAFS Fitting Results for [1·O<sub>2</sub>]B(C<sub>6</sub>F<sub>5</sub>)<sub>4</sub> with Cu-C or Cu-O Contribution**

| CN/Path <sup>a</sup> | <i>R</i> (Å) <sup>b</sup> | $\sigma^2$ (Å <sup>2</sup> ) <sup>c</sup> | $\Delta E_0$ (eV) | Error <i>F</i> <sup>d</sup> |
|----------------------|---------------------------|-------------------------------------------|-------------------|-----------------------------|
| <b>with Cu-C</b>     |                           |                                           |                   |                             |
| 4 Cu-O/N             | 1.96                      | 948                                       | -12.24            | 0.25                        |
| <i>1 Cu-C</i>        | 2.85                      | 452                                       |                   |                             |
| 14 Cu-N-C            | 3.29                      | 383                                       |                   |                             |
| 6 Cu-N/C-N/C         | 4.24                      | 893                                       |                   |                             |
| 12 Cu-N/C-N/C        | 4.63                      | 351                                       |                   |                             |
| <b>with Cu-O</b>     |                           |                                           |                   |                             |
| 4 Cu-O/N             | 1.96                      | 947                                       | -12.08            | 0.24                        |
| <i>1 Cu-O</i>        | 2.80                      | 602                                       |                   |                             |
| 14 Cu-N-C            | 3.30                      | 453                                       |                   |                             |
| 6 Cu-N/C-N/C         | 4.25                      | 906                                       |                   |                             |
| 12 Cu-N/C-N/C        | 4.63                      | 468                                       |                   |                             |

<sup>a</sup>CN is coordination number. <sup>b</sup>The estimated standard deviations in *R* are ±0.02 Å. <sup>c</sup>The  $\sigma^2$  values are multiplied by 10<sup>5</sup>. <sup>d</sup>The error *F* is given by  $[\sum k^6(\chi_{\text{exptl}} - \chi_{\text{calcd}})^2 / \sum k^6 \chi_{\text{exptl}}^2]^{1/2}$ . Errors in coordination numbers are ±25% and those in the identity of the scatterer *Z* are ±1. The Cu-C or Cu-O contribution which replaces the Cu-S contribution in the best fit is indicated with the italic font.

## 8. Density Functional Theory Computations

Calculations were performed using ORCA 4.2.1<sup>13</sup> at the RIJCOSX-B3LYP-D3(BJ)/Def2-TZVP level of theory<sup>14-20</sup> with a conductor-like polarizable continuum model<sup>21</sup> to model tetrahydrofuran solvation. Geometry optimizations were initiated from the crystal structure. The optimized structures largely agreed with experimental results, showing an increase in copper–sulfur distance upon O<sub>2</sub> binding (calculated 2.32 Å to 2.50 Å; experiment 2.27 Å to 2.55 Å). Comparison of vibrational levels with experiment was complicated by mixing of modes with the ligand, but a weighted average gave 378 cm<sup>-1</sup> (Cu–O) and 1173 cm<sup>-1</sup> (O–O).

### 8.1. Optimized Coordinates of [1]<sup>+</sup>

|    |                   |                   |                   |
|----|-------------------|-------------------|-------------------|
| Cu | -0.04516643556445 | 0.00032479526531  | -0.00885512610058 |
| N  | -0.05223785932137 | -0.01782617142287 | -2.27039192911036 |
| C  | -1.44175972981732 | -0.36919125007648 | -2.57312666111229 |
| H  | -1.71759512574404 | -0.07598841920926 | -3.59615796886599 |
| H  | -1.53413865345154 | -1.45331096032946 | -2.50904619457946 |
| C  | -2.42350246998953 | 0.26095303398839  | -1.58713067748671 |
| H  | -3.43404169365740 | -0.06824149083584 | -1.84718112607095 |
| H  | -2.40560969244515 | 1.34681560984768  | -1.71844681141356 |
| N  | -2.08213901902418 | -0.10898433006512 | -0.21763674566101 |
| C  | -3.02239922462542 | -0.19495211527417 | 0.68004449259237  |
| N  | -2.82798850098680 | -0.93999276597462 | 1.81400092970899  |
| C  | -3.26279311418169 | -0.45836584167445 | 3.11761949088148  |
| H  | -3.83938681037761 | 0.45519288040610  | 3.01017636908091  |
| H  | -3.87457732300594 | -1.20570422314509 | 3.62843945624212  |
| H  | -2.39126871806135 | -0.24240338453026 | 3.74399941024732  |
| C  | -1.80580495711239 | -1.96513784291048 | 1.85435097471860  |
| H  | -0.82893908125248 | -1.56397884493047 | 2.14880187434787  |
| H  | -2.10163436753502 | -2.72396733922047 | 2.58109521547119  |
| H  | -1.70322225352346 | -2.42385490792588 | 0.87498578710693  |
| N  | -4.25379044346487 | 0.40642204425437  | 0.56657877299263  |
| C  | -5.47800919340446 | -0.22545571476135 | 1.02832194261291  |
| H  | -5.89343835099879 | 0.27844620555042  | 1.90729892621495  |



|   |                   |                   |                   |
|---|-------------------|-------------------|-------------------|
| H | -6.22593926623366 | -0.18841441271607 | 0.23143560629757  |
| H | -5.28687595028228 | -1.26571693820219 | 1.27711307493158  |
| C | -4.39644447912035 | 1.75907771608174  | 0.05935137413341  |
| H | -3.42431767901639 | 2.23848799115268  | -0.00683147776184 |
| H | -4.87202192451293 | 1.78700461763779  | -0.92559825353747 |
| H | -5.01338853170498 | 2.33711350897725  | 0.75298591383134  |
| C | 0.30876288655164  | 1.36640937806953  | -2.58869992341292 |
| H | 0.66796505796465  | 1.46121093506287  | -3.62254147011509 |
| H | -0.58698581970125 | 1.97890209581045  | -2.49940031310166 |
| C | 1.36876849778492  | 1.91345361914001  | -1.63247081912706 |
| H | 1.57404180068273  | 2.95510260508116  | -1.89756766026532 |
| H | 2.30210039652158  | 1.36481966434874  | -1.79210389042714 |
| N | 0.91436555819503  | 1.80097445485727  | -0.25020071434891 |
| C | 1.31351344049602  | 2.66684343655218  | 0.63663459979539  |
| N | 0.57766254248374  | 2.87593129435609  | 1.77750281756531  |
| C | 1.23281534414666  | 2.95872806032538  | 3.07642466893744  |
| H | 2.30376489610357  | 3.08448656502855  | 2.95277645685045  |
| H | 0.84095852617790  | 3.79807703890558  | 3.65476584901628  |
| H | 1.05892003331951  | 2.03761839823591  | 3.64399429649317  |
| C | -0.80950988555837 | 2.46223277519814  | 1.83046002278683  |
| H | -0.91601495141745 | 1.40405248013358  | 2.09951690379009  |
| H | -1.32568266566802 | 3.06351062998041  | 2.58093056368088  |
| H | -1.27600310074691 | 2.61057167184594  | 0.86122664077159  |
| N | 2.44108087487793  | 3.44167605614597  | 0.50431454951717  |
| C | 2.50869628701587  | 4.81460828115036  | 0.97493881311676  |
| H | 3.16693263328798  | 4.91906848377819  | 1.84381816415649  |
| H | 2.89992231399820  | 5.45066782314878  | 0.17627104126515  |
| H | 1.51512734995333  | 5.16274038457117  | 1.24365062454426  |
| C | 3.67753013140690  | 2.89440537736077  | -0.02454861042308 |
| H | 3.61788212706640  | 1.81053554975758  | -0.06390539025533 |
| H | 3.90977160706532  | 3.27372457814542  | -1.02417400140174 |
| H | 4.50019139422221  | 3.16448824465403  | 0.64306138507072  |
| C | 0.92043323896915  | -1.00403364412846 | -2.73127288127327 |
| H | 0.69098872257058  | -1.34725932594234 | -3.75020816462292 |
| H | 1.89823406566090  | -0.52693546401876 | -2.77867246135361 |
| C | 1.00518912019847  | -2.23221082172950 | -1.82635293054533 |
| H | 0.06006290030511  | -2.77458254799642 | -1.80680190773266 |
| H | 1.76610541469768  | -2.91947277553722 | -2.19480524621220 |
| S | 1.33580605955069  | -1.85952335072191 | -0.06521264817578 |
| C | 3.05393553809058  | -1.23929997078411 | -0.11206523906866 |
| H | 3.20361149049926  | -0.82182321599591 | 0.88392447141699  |
| H | 3.10201111239157  | -0.41409251095453 | -0.82057023101982 |
| C | 4.09277333687476  | -2.30357371967227 | -0.42451949528829 |
| H | 3.95223784288073  | -2.72147913222490 | -1.42225467908863 |
| H | 5.09197840918264  | -1.86346354018284 | -0.38674652703178 |
| H | 4.04907632031361  | -3.11889131171215 | 0.29874669580428  |

## 8.2 Optimized Coordinates of $[1\cdot\text{O}_2]^+$

|    |                   |                   |                   |
|----|-------------------|-------------------|-------------------|
| Cu | 0.13435586004532  | -0.17339561825732 | -0.04636153348699 |
| O  | 0.20224109574098  | -0.22887774765788 | 1.94536633439382  |
| O  | 1.40223131722906  | -0.25916315008569 | 2.40723583837849  |
| N  | 0.08590102857705  | -0.18668179114921 | -2.24303135388981 |
| C  | -1.31955075006380 | -0.48401282746371 | -2.58979704689674 |
| H  | -1.44094531522387 | -1.56606207085639 | -2.60130166987141 |
| H  | -1.55282710204030 | -0.10846573091327 | -3.59244101453434 |
| C  | -2.27432112405880 | 0.09941504222866  | -1.55871458733715 |
| H  | -2.22946468311746 | 1.19231208545163  | -1.60166545934042 |
| H  | -3.29682370597231 | -0.18598736816010 | -1.81981219075702 |
| N  | -1.89415412444397 | -0.40690576573921 | -0.24639378718262 |
| C  | -2.80378570057920 | -0.62394211807643 | 0.67065188937224  |
| N  | -2.58519390278842 | -1.55374740083098 | 1.64084649938911  |
| C  | -2.96916256810040 | -1.32598649292645 | 3.02502889358641  |
| H  | -2.07562884224263 | -1.34663939271903 | 3.65441613175879  |
| H  | -3.66207473247765 | -2.09426919355340 | 3.37796997128741  |
| H  | -3.43806266387035 | -0.35193051332905 | 3.12941752830696  |
| C  | -1.71673490435906 | -2.69376946963370 | 1.41642546808830  |
| H  | -1.61413375463635 | -2.86834309667185 | 0.34923153455775  |
| H  | -2.16597834344501 | -3.57349117649111 | 1.88361219450867  |
| H  | -0.72477623599889 | -2.53979732015059 | 1.84532443129069  |
| N  | -4.00933604407209 | 0.02165887805609  | 0.70870194198104  |
| C  | -5.23382925424169 | -0.63176029455850 | 1.14368485167284  |
| H  | -5.07061595150445 | -1.70168011831058 | 1.23587010636451  |
| H  | -6.01430260025072 | -0.45918602303386 | 0.39836899452336  |
| H  | -5.58497634931999 | -0.24082250874502 | 2.10322996469711  |
| C  | -4.13910065004170 | 1.42468839374408  | 0.35680502760371  |
| H  | -3.15811594895927 | 1.88022323156759  | 0.27560195669525  |
| H  | -4.69168250371991 | 1.94001392859481  | 1.14645438397475  |
| H  | -4.67600768743497 | 1.56535776177598  | -0.58546709498910 |
| C  | 0.48248017546425  | 1.18755698353483  | -2.61921781237320 |
| H  | -0.38111064177802 | 1.83715250630721  | -2.48808947892577 |
| H  | 0.77598115802380  | 1.22566079400959  | -3.67408042468238 |
| C  | 1.60669836959366  | 1.68368835453797  | -1.71971973850157 |
| H  | 2.51075461040644  | 1.09371144697277  | -1.90277474671691 |
| H  | 1.84922042557563  | 2.71564698066242  | -1.98776586616063 |
| N  | 1.14561923399675  | 1.58462220664493  | -0.34237894119652 |
| C  | 1.54259412474483  | 2.45835762533586  | 0.55066299208629  |
| N  | 2.76050297007241  | 3.07464086768825  | 0.50272638152456  |
| C  | 2.96294001652578  | 4.45526459700286  | 0.91201608342747  |
| H  | 2.00287838394012  | 4.93863411962913  | 1.06933748613495  |
| H  | 3.49617121851422  | 4.98826045985146  | 0.12096019232042  |
| H  | 3.55286425637859  | 4.52669465722564  | 1.83036095159143  |

|   |                   |                   |                   |
|---|-------------------|-------------------|-------------------|
| C | 3.94069886433507  | 2.37044061168496  | 0.03298564128352  |
| H | 3.74914234511739  | 1.30151447007174  | 0.02346600359692  |
| H | 4.76651916269547  | 2.56551533690646  | 0.72079875576009  |
| H | 4.24488484090072  | 2.68945834048568  | -0.96818249866900 |
| N | 0.71620593003479  | 2.81015717695505  | 1.57257807258090  |
| C | 1.20115894693782  | 3.03152675512541  | 2.92564884163306  |
| H | 2.27401707410404  | 2.87204800249328  | 2.96992116667628  |
| H | 0.72086993051454  | 2.31943778050181  | 3.60120978155630  |
| H | 0.97482149843295  | 4.04463890651608  | 3.26810643934202  |
| C | -0.72462220972880 | 2.71263794643258  | 1.43843602942695  |
| H | -0.98925326240666 | 2.71789616029764  | 0.38523123437725  |
| H | -1.18384806393755 | 3.57293557013547  | 1.93093648446998  |
| H | -1.11270452895281 | 1.80018226348780  | 1.89712489165351  |
| C | 1.01234457399234  | -1.17545414147890 | -2.82366977718518 |
| H | 2.00673026319394  | -0.73479139250564 | -2.85126342127733 |
| H | 0.73210287121452  | -1.38627571770003 | -3.86285529131357 |
| C | 1.06545896742557  | -2.48143432664520 | -2.04725181158702 |
| H | 1.77928265916526  | -3.16089343539190 | -2.51069754901276 |
| H | 0.09889907384768  | -2.98497474833579 | -2.03719776942495 |
| S | 1.47874509624294  | -2.26166158404241 | -0.28765645133434 |
| C | 3.19591522859287  | -1.64978919536983 | -0.33866799850712 |
| H | 3.23722062763839  | -0.78084669560330 | -0.99307969659938 |
| H | 3.36423408267787  | -1.29812973078602 | 0.67924687881177  |
| C | 4.21633163111759  | -2.69920425360896 | -0.74628849928143 |
| H | 4.18803833571247  | -3.55579101968154 | -0.07185249553384 |
| H | 5.21911838348487  | -2.26730869664655 | -0.71285319395950 |
| H | 4.04172951755915  | -3.05535811480632 | -1.76260905015685 |

### 8.3. Optimized Coordinates of [2]<sup>+</sup>

|    |                   |                   |                   |
|----|-------------------|-------------------|-------------------|
| Cu | -0.02066868611896 | -0.00353738230438 | -0.21719674693897 |
| N  | -0.13934861456512 | 0.00952207021358  | -2.47941092649463 |
| C  | 0.84379624850358  | 1.02078067960500  | -2.85649290466307 |
| H  | 0.36509195533370  | 1.99763932276271  | -2.79207069235079 |
| H  | 1.18369668795239  | 0.89181293724418  | -3.89481542384174 |
| C  | 2.05956738612561  | 1.01373831939659  | -1.92743035022918 |
| H  | 2.59695443814516  | 0.06984238481167  | -2.06148835052403 |
| H  | 2.74291295386593  | 1.81050392942085  | -2.23827178593246 |
| N  | 1.64331827680089  | 1.18269423584543  | -0.53987251994483 |
| C  | 2.42778794627239  | 1.77708690647629  | 0.30689744789680  |
| N  | 3.78169097073479  | 1.95349363157852  | 0.12539998354209  |
| C  | 4.47419944433851  | 3.15589183413655  | 0.55344854118907  |
| H  | 3.75252163166573  | 3.92421913893190  | 0.81679574151232  |

|   |                   |                   |                   |
|---|-------------------|-------------------|-------------------|
| H | 5.09685009533147  | 3.52512375837867  | -0.26617715946128 |
| H | 5.12462032298800  | 2.97179437563035  | 1.41557852105311  |
| C | 4.62635838401048  | 0.89276047196243  | -0.39113964796595 |
| H | 4.06572581502257  | -0.03471320653170 | -0.45687823844832 |
| H | 5.46576799087430  | 0.73463292074713  | 0.29286312747340  |
| H | 5.03202128561900  | 1.13064773388654  | -1.37927427945655 |
| N | 1.91418388984431  | 2.31343521729842  | 1.46644459272180  |
| C | 2.58028563528556  | 2.08685707864835  | 2.74191764019473  |
| H | 2.01695241245728  | 1.36131617118952  | 3.33981338276969  |
| H | 2.65418839187322  | 3.01571457880125  | 3.31163671785674  |
| H | 3.57885213264877  | 1.69157990950472  | 2.58259972510507  |
| C | 0.49481909477494  | 2.58072667648965  | 1.56780727314647  |
| H | 0.11781238838550  | 2.93225184889906  | 0.61180327201955  |
| H | 0.33495256615331  | 3.34649493653453  | 2.32911350274584  |
| H | -0.07692907082839 | 1.68648809423511  | 1.84489018119141  |
| C | -1.52990263961043 | 0.37432220207481  | -2.73331015708846 |
| H | -2.13334941594037 | -0.53118555784866 | -2.67349651643847 |
| H | -1.66542006545831 | 0.78994612217420  | -3.74280654391212 |
| C | -2.05670548989620 | 1.37723027026846  | -1.70488541928769 |
| H | -1.51265361251283 | 2.31894479189204  | -1.82547742868741 |
| H | -3.10685416234539 | 1.59001018447914  | -1.92911970977234 |
| N | -1.89753474071965 | 0.85458912059276  | -0.35242016310504 |
| C | -2.74070455807846 | 1.18862698680721  | 0.57703647897832  |
| N | -2.86791912525970 | 0.41150349240354  | 1.70710039374425  |
| C | -2.91015349102523 | 1.03038346669445  | 3.02544459127472  |
| H | -1.95395869235690 | 0.88821841099598  | 3.54228536159037  |
| H | -3.69847915376866 | 0.58568311660603  | 3.63663110074922  |
| H | -3.09182496015981 | 2.09698596429732  | 2.93760245003152  |
| C | -2.37767738000175 | -0.95102774824422 | 1.69965948498916  |
| H | -2.56497220022312 | -1.40457494686310 | 0.73086380101650  |
| H | -2.89815256952679 | -1.51504301632108 | 2.47572594416580  |
| H | -1.29865145748380 | -1.00497935241439 | 1.89062766736292  |
| N | -3.57634563698908 | 2.28199252464515  | 0.51526642002142  |
| C | -4.92781562583146 | 2.26314545546429  | 1.04640338994966  |
| H | -5.22069390214681 | 1.24254072790409  | 1.27732268204653  |
| H | -5.61556044031062 | 2.66444455066177  | 0.29680746918644  |
| H | -5.02333236038136 | 2.87157018899781  | 1.95235388079064  |
| C | -3.11073977894397 | 3.56893978184952  | 0.03211333557552  |
| H | -2.03334450727627 | 3.55223126695613  | -0.10079395669616 |
| H | -3.34947972822986 | 4.33823993652272  | 0.77253685827414  |
| H | -3.57864092351292 | 3.85065759961126  | -0.91608056980558 |
| C | 0.21579594670859  | -1.36060425577116 | -2.83593891753334 |
| H | 1.30294802260998  | -1.43324965962385 | -2.85533333301816 |
| H | -0.14716198364959 | -1.62932243255309 | -3.83918813810115 |
| C | -0.31866016440920 | -2.37346922659614 | -1.82161726215918 |
| H | -1.41221273644063 | -2.36684077483611 | -1.86297207613981 |

|   |                   |                   |                   |
|---|-------------------|-------------------|-------------------|
| H | 0.00165301122458  | -3.37500030540004 | -2.12584695332909 |
| N | 0.15221801657977  | -2.04870906755242 | -0.48000547220817 |
| C | 0.35391320807660  | -2.99597928346036 | 0.38527190646110  |
| N | 1.17127310774183  | -2.77654158850885 | 1.47099706499243  |
| C | 0.76733811157042  | -3.20997147250957 | 2.80165240210526  |
| H | 0.45900639969325  | -2.34773645266213 | 3.40376103605743  |
| H | 1.59378659921316  | -3.70719246314668 | 3.31425596187716  |
| H | -0.07139749358356 | -3.89633069737145 | 2.73849716104013  |
| C | 2.10264806349867  | -1.66847813565355 | 1.45558930974954  |
| H | 2.51333788034841  | -1.54561167524769 | 0.45793964502804  |
| H | 2.90868896140009  | -1.87798150436208 | 2.16112997610051  |
| H | 1.62551648999683  | -0.72198000614111 | 1.73800535357123  |
| N | -0.17875679502565 | -4.26290833119582 | 0.29282574987475  |
| C | -1.55760976581968 | -4.47953423891133 | -0.10393237274058 |
| H | -2.08881999610624 | -3.53347744524514 | -0.14316946427505 |
| H | -2.04981267935930 | -5.11462188517722 | 0.63866400918140  |
| H | -1.63769219707114 | -4.96970218688687 | -1.07901063476870 |
| C | 0.55269280694027  | -5.45015785706267 | 0.69828063979571  |
| H | 1.59404366909819  | -5.19913843777003 | 0.88048375216408  |
| H | 0.50684721978458  | -6.19472051250851 | -0.10164065431725 |
| H | 0.13385094147460  | -5.90099421784626 | 1.60455984147149  |

#### 8.4 Optimized Coordinates of $[2\cdot\text{O}_2]^+$

|    |                   |                   |                   |
|----|-------------------|-------------------|-------------------|
| Cu | 0.01067962901335  | -0.00852962323727 | -0.04193123449543 |
| O  | -0.09835855050202 | -0.02871037427114 | 1.94286615744684  |
| O  | 0.97767745561778  | 0.06245096679442  | 2.65198179260781  |
| N  | -0.10367247749261 | 0.01582010038053  | -2.23324465368407 |
| C  | 0.97202496107886  | 0.91590041338599  | -2.68796875054211 |
| H  | 0.59191794715767  | 1.93642532076130  | -2.66850562996035 |
| H  | 1.25637280083811  | 0.68310306478819  | -3.72073391554423 |
| C  | 2.17414612277534  | 0.82948524813185  | -1.75789582386131 |
| H  | 2.60788203144762  | -0.17481028898564 | -1.81444775090348 |
| H  | 2.94052943351158  | 1.52789948933894  | -2.10354036654364 |
| N  | 1.72056214444567  | 1.14464515583367  | -0.41038287713791 |
| C  | 2.46761664687562  | 1.88048822069543  | 0.37057026776295  |
| N  | 3.83295903494259  | 1.95391640987427  | 0.26354063440314  |
| C  | 4.57145815073077  | 3.18783153884494  | 0.47225244139189  |
| H  | 3.88282376855185  | 4.02455562923785  | 0.54985867928040  |
| H  | 5.23300253756995  | 3.35830103158407  | -0.38142617502287 |
| H  | 5.18587443308683  | 3.14907829826823  | 1.37708628313019  |
| C  | 4.63730121814981  | 0.79429285628031  | -0.07339242904558 |
| H  | 4.03171061390512  | -0.10357795814947 | -0.02238948243005 |

|   |                   |                   |                   |
|---|-------------------|-------------------|-------------------|
| H | 5.45271608427972  | 0.70115001622216  | 0.64908100393837  |
| H | 5.07405411534715  | 0.87196843907248  | -1.07356381813712 |
| N | 1.89874132060994  | 2.66111510114593  | 1.33071560118052  |
| C | 2.49873879192613  | 2.84329237473132  | 2.64236606158315  |
| H | 1.81179817738912  | 2.47447568585913  | 3.40738321975344  |
| H | 2.70913321347286  | 3.89813391589183  | 2.83882608135965  |
| H | 3.42207135805837  | 2.27682442816692  | 2.71409095048457  |
| C | 0.52784629509259  | 3.11128570780888  | 1.20808845902986  |
| H | 0.24399519854781  | 3.10848845505129  | 0.16015708145489  |
| H | 0.45469370321609  | 4.12822037829255  | 1.60102069200445  |
| H | -0.16522425753510 | 2.47154534849978  | 1.75946366971738  |
| C | -1.44446243122649 | 0.52023046344613  | -2.58642473343241 |
| H | -2.13498362650958 | -0.32191323999229 | -2.58256090856165 |
| H | -1.44038751064045 | 0.94650008351606  | -3.59626721154917 |
| C | -1.92461879919268 | 1.54227754728088  | -1.56656913342880 |
| H | -1.28084903592489 | 2.42744807425360  | -1.61149030162217 |
| H | -2.93322619596346 | 1.86837010260872  | -1.83544782042840 |
| N | -1.88591031237088 | 0.91486930404204  | -0.25502621178175 |
| C | -2.81956299293446 | 1.15982446600477  | 0.62382619909998  |
| N | -3.12004626793887 | 0.23164526483672  | 1.57936192586419  |
| C | -3.35803773204341 | 0.60238523737361  | 2.96430687080709  |
| H | -2.57291669690372 | 0.17491824875759  | 3.59454102756161  |
| H | -4.32556113922789 | 0.23096096609741  | 3.31281778575113  |
| H | -3.33442870434847 | 1.68260932419495  | 3.07434042592293  |
| C | -2.88796057864095 | -1.17936505236747 | 1.34777783726780  |
| H | -2.87293418420817 | -1.36691297658539 | 0.27822327564864  |
| H | -3.70194300821099 | -1.74928116072535 | 1.80320706297986  |
| H | -1.94136022807059 | -1.51326467795498 | 1.77763909689014  |
| N | -3.57685163980970 | 2.30332931552859  | 0.64220213676318  |
| C | -4.97536945584352 | 2.30770902165676  | 1.03817231478179  |
| H | -5.34365234754087 | 1.28848454795803  | 1.11199682510914  |
| H | -5.55962312100936 | 2.83828254762794  | 0.28168346519350  |
| H | -5.12654149028965 | 2.81038868222150  | 1.99861715682531  |
| C | -3.02301709606427 | 3.60220166044788  | 0.30659743144992  |
| H | -1.94605844014877 | 3.53473588677769  | 0.20719888823137  |
| H | -3.24972577560008 | 4.30871931622268  | 1.10991894654752  |
| H | -3.44105791766214 | 3.99715178644437  | -0.62391252083194 |
| C | 0.10239320514359  | -1.37290761537383 | -2.68530026913023 |
| H | 1.17443654494180  | -1.55730916005631 | -2.73868257832660 |
| H | -0.31365076674015 | -1.51498263423279 | -3.68947017804808 |
| C | -0.50757362673388 | -2.35426263568339 | -1.69476584350445 |
| H | -1.59464706694761 | -2.22129388658912 | -1.67420637915361 |
| H | -0.31747563113720 | -3.37461035361740 | -2.03884419695101 |
| N | 0.09234974044536  | -2.09702648038167 | -0.39529089662396 |
| C | 0.38234969032960  | -3.08453221548448 | 0.40859954195558  |
| N | 1.40991052353398  | -2.95497475072868 | 1.29672739607251  |

|   |                   |                   |                   |
|---|-------------------|-------------------|-------------------|
| C | 1.29954565587591  | -3.40319753266938 | 2.67447273269753  |
| H | 1.37984702249041  | -2.54305962897777 | 3.34481119151357  |
| H | 2.08845666871749  | -4.11745680969291 | 2.92635196235614  |
| H | 0.33368409335966  | -3.87344377159416 | 2.83751135064664  |
| C | 2.54696106961758  | -2.10519928166507 | 0.99338772755147  |
| H | 2.64001983648776  | -2.00667026755084 | -0.08498911999327 |
| H | 3.45011629362384  | -2.57786505623754 | 1.38844079323513  |
| H | 2.44407319427446  | -1.11341432768634 | 1.43567128551059  |
| N | -0.25965270044761 | -4.29524225893515 | 0.40614532480163  |
| C | -1.67891862663043 | -4.41996894648952 | 0.13072479706440  |
| H | -2.14069891388723 | -3.44051679480991 | 0.09942511235418  |
| H | -2.15127609953546 | -4.99782795752670 | 0.92988725538816  |
| H | -1.86692608619673 | -4.93128445266008 | -0.81780695634269 |
| C | 0.42698064045089  | -5.54311665517901 | 0.69754873973085  |
| H | 1.50023430082717  | -5.37901053449124 | 0.72538279586245  |
| H | 0.20279457929784  | -6.26744669094578 | -0.08994624989664 |
| H | 0.10734128505468  | -5.96984939071212 | 1.65324866094951  |

## 9. Reactivity and Kinetic Studies

The substrates TEMPO–H (10, 20, 30, 80 mmols) and TEMPO–D (40, 60, 120, 300 mmols) were added to 0.4 mM solutions of  $[1\cdot O_2]B(C_6F_5)_4$  via syringe and allowed to react at  $-135\text{ }^\circ\text{C}$ . Decay of the superoxide band at 742 nm was monitored over time and the pseudo-first-order rate constants were calculated from the fitted exponential slopes. A plot of  $k_{\text{obs}}$  vs substrate concentration was used to determine the second order rate constant. See Figures **S6-S9** and Table **S4** for details.

The same procedure mentioned above was followed for the reactions of TEMPO–H (20, 30, 40, 50 mmols) with 0.4 mM solutions of  $[2\cdot O_2]B(C_6F_5)_4$ . See figures **S10-S11** and Table **S5** for details.

**[1·O<sub>2</sub>]B(C<sub>6</sub>F<sub>5</sub>)<sub>4</sub> with TEMPO–H:**

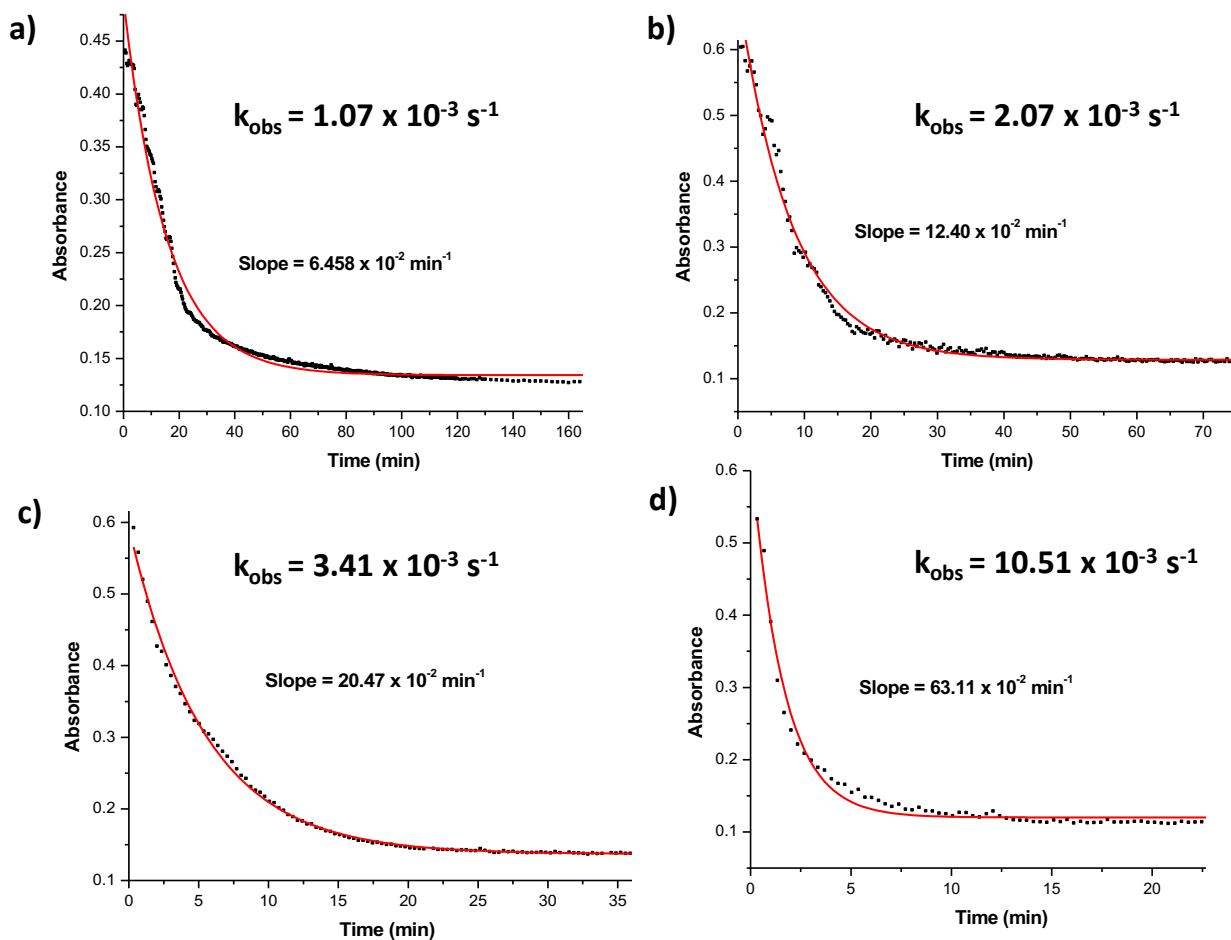

**Figure S6.** Representative exponential plots of absorbance at 742 nm versus time for the reaction of  $\sim 0.4$  mM  $[1\cdot O_2]B(C_6F_5)_4$  at  $-135$  °C in 2-MeTHF with (a) 10, (b) 20, (c) 30 and (d) 80 mmols of TEMPO–H to determine  $k_{obs}$  at each concentration. Black dots represent the actual absorbances recorded and the red line is the fitted trace.



**Table S4.** Table containing the  $k_{\text{obs}}$  ( $\text{s}^{-1}$ ) values for the reaction of 0.4 mM  $[\text{1}\cdot\text{O}_2]\text{B}(\text{C}_6\text{F}_5)_4$  at  $-135\text{ }^\circ\text{C}$  in 2-MeTHF with 10, 20, 30 and 80 mmols of TEMPO–H.

| mol      | $k_{\text{obs}}\text{ s}^{-1}$ |          |          | Average  |
|----------|--------------------------------|----------|----------|----------|
|          | Trial 1                        | Trial 2  | Trial 3  |          |
| 1.00E-02 | 1.06E-03                       | 1.07E-03 | 0.97E-03 | 1.03E-03 |
| 2.00E-02 | 2.07E-03                       | 2.30E-03 | 2.09E-03 | 2.15E-03 |
| 3.00E-02 | 3.10E-03                       | 3.41E-03 | 4.25E-03 | 3.57E-03 |
| 8.00E-02 | 0.75E-02                       | 1.05E-02 | 1.36E-02 | 1.05E-02 |

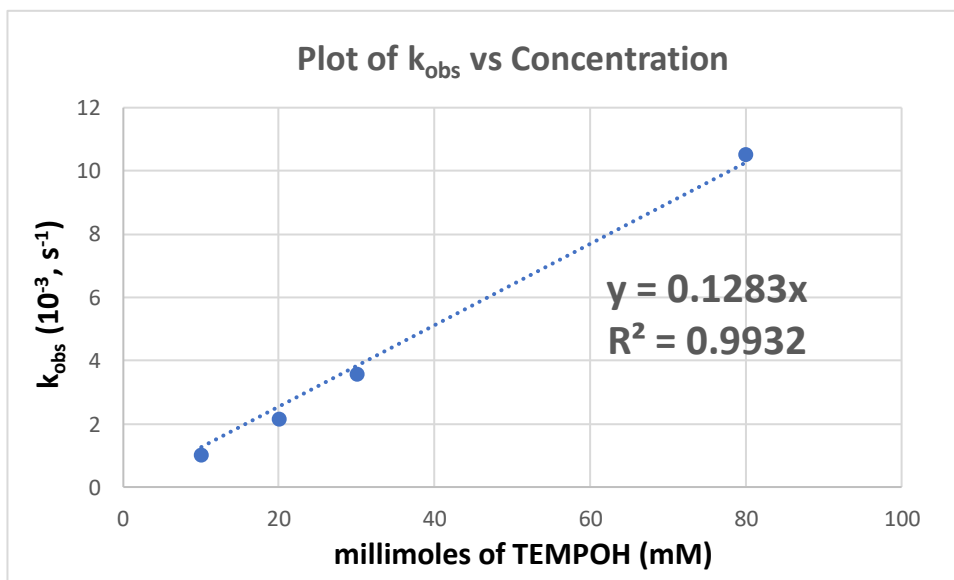

**Figure S7.** Plot for  $[\text{1}\cdot\text{O}_2]\text{B}(\text{C}_6\text{F}_5)_4$  of pseudo-first order rate constants ( $k_{\text{obs}}$ ) against the TEMPO–H concentrations; from the slope of the linear fit, the second-order rate constant is calculated to be  $1.28 \times 10^{-1}\text{ M}^{-1}\text{ s}^{-1}$ .

**[1·O<sub>2</sub>]B(C<sub>6</sub>F<sub>5</sub>)<sub>4</sub> with TEMPO–D:**

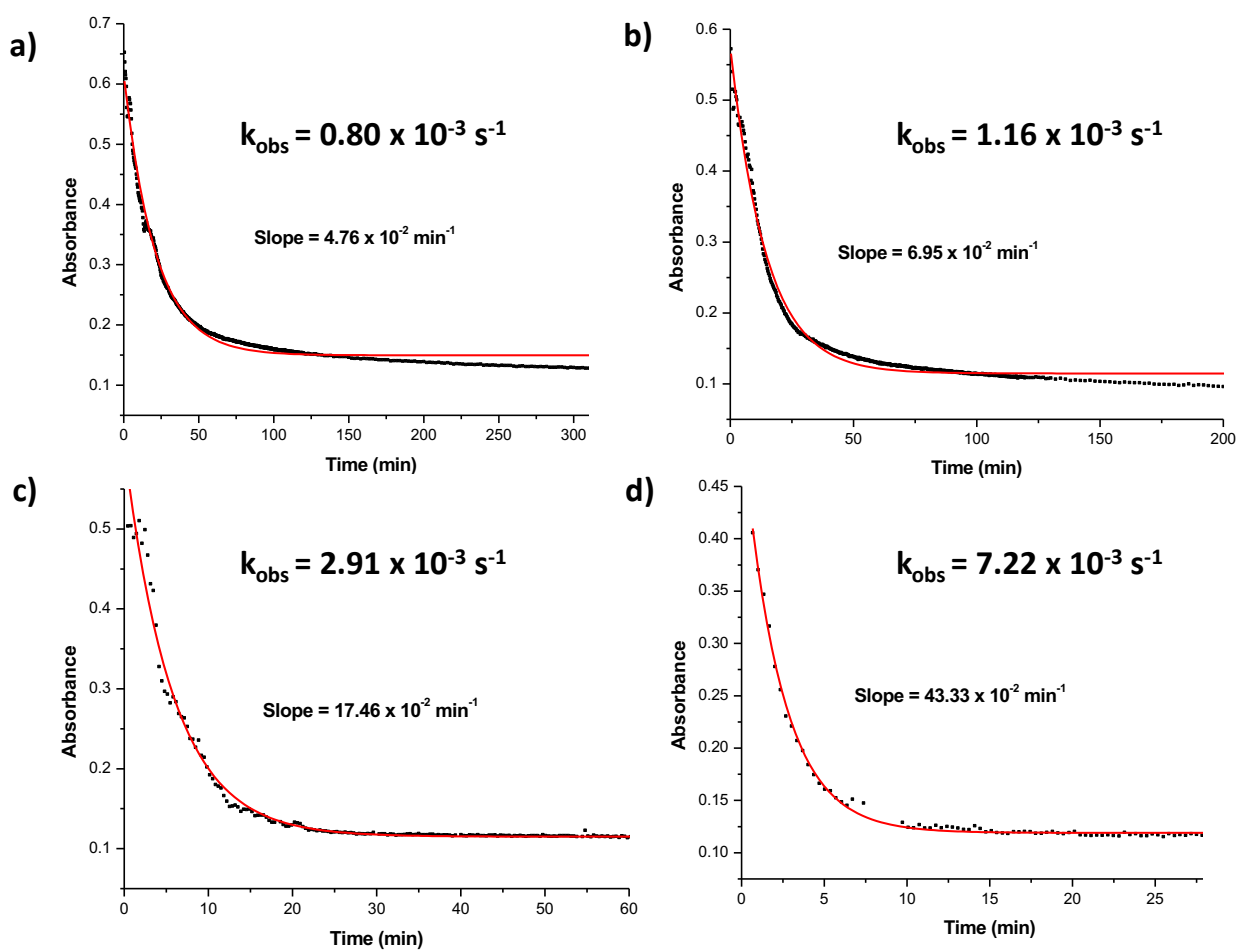

**Figure S8.** Representative exponential plots of absorbance at 742 nm versus time for the reaction of  $\sim 0.4$  mM  $[1\cdot O_2]B(C_6F_5)_4$  at  $-135^\circ C$  in 2-MeTHF with (a) 40, (b) 60, (c) 120 and (d) 300 mmols of TEMPO–D to determine  $k_{obs}$  at each concentration. Black dots represent the actual absorbances recorded and the red line is the fitted trace.

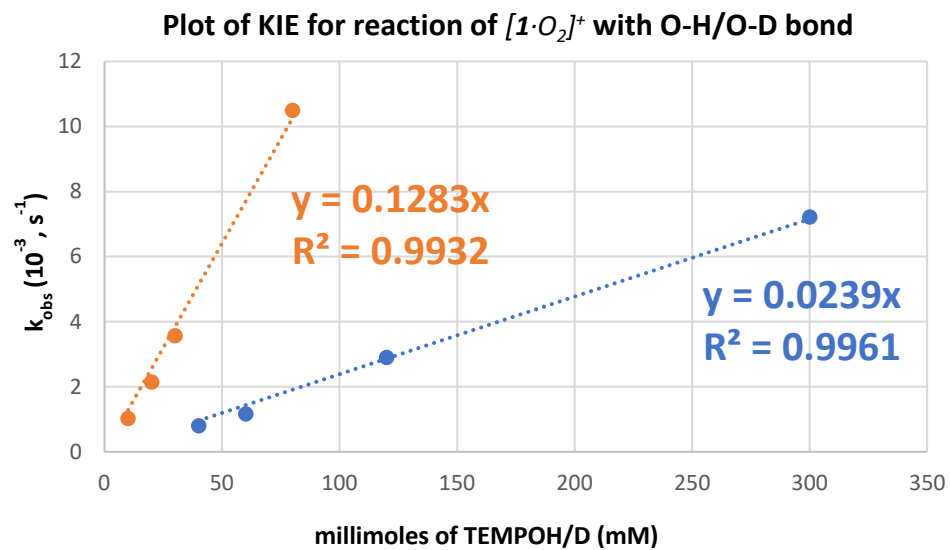

**Figure S9.** Plots of pseudo first order rate constants ( $k_{obs}$ ) plotted against various concentrations of TEMPO-H(D) to obtain the second order rate constant,  $k_H = 1.28 \times 10^{-1} M^{-1}sec^{-1}$  (orange circle) and  $k_D = 0.24 \times 10^{-1} M^{-1}sec^{-1}$  (blue circle) thus yielding a primary KIE of 5.4 in 2-MeTHF at  $-135^\circ C$ , for H-atom abstraction by  $[1\cdot O_2]B(C_6F_5)_4$ .

**[2·O<sub>2</sub>]B(C<sub>6</sub>F<sub>5</sub>)<sub>4</sub> with TEMPO–H:**

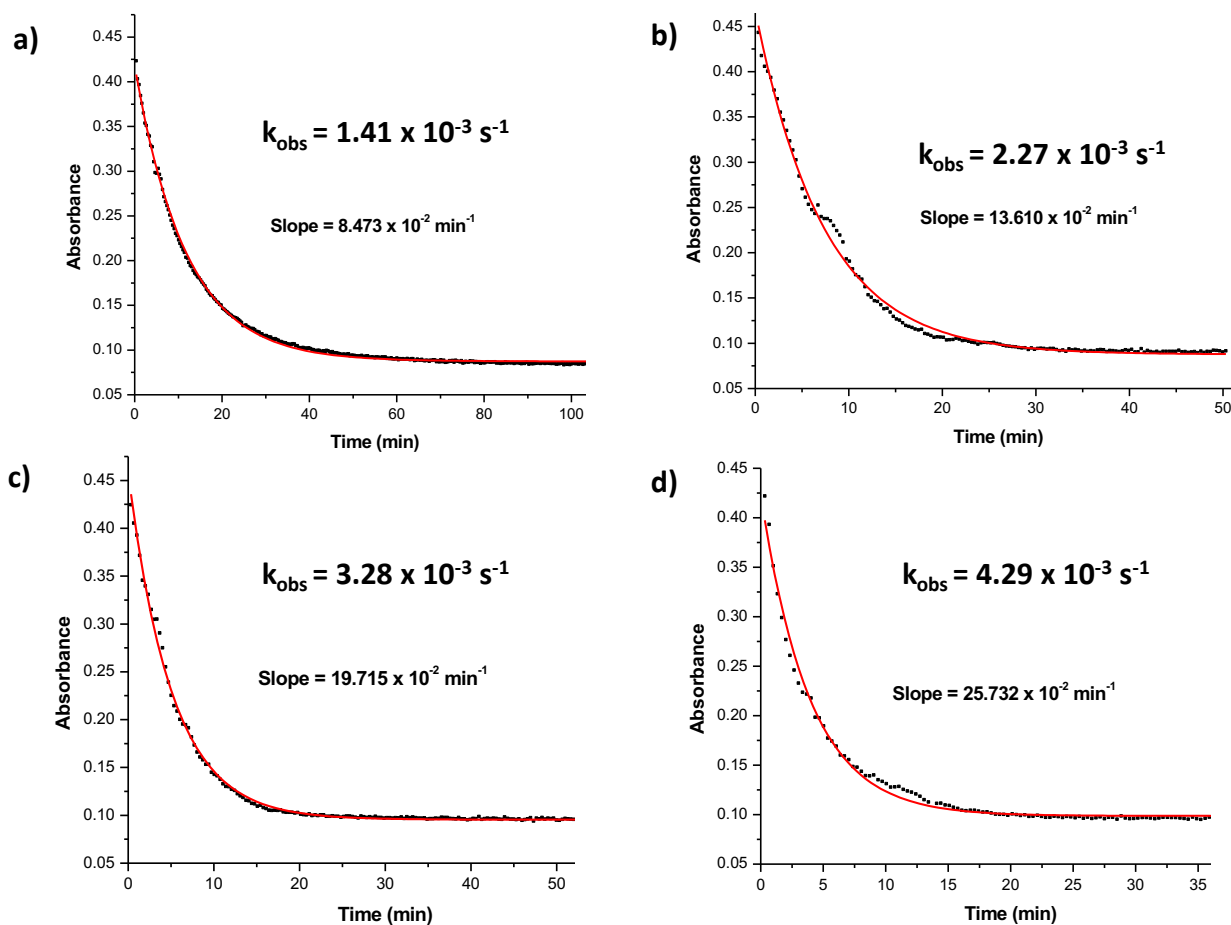

**Figure S10.** Representative exponential plots of absorbance at 780 nm versus time for the reaction of  $\sim 0.4$  mM  $[2\cdot O_2]B(C_6F_5)_4$  at  $-135$  °C in MeTHF with (a) 20, (b) 30, (c) 40 and (d) 50 mmols of TEMPO–H to determine  $k_{obs}$  at each concentration. Black dots represent the actual absorbances recorded and the red line is the fitted trace.

**Table S5.** Table containing the  $k_{\text{obs}}$  ( $\text{s}^{-1}$ ) values for the reaction of  $\sim 0.4 \text{ mM } [\mathbf{2} \cdot \text{O}_2]\text{B}(\text{C}_6\text{F}_5)_4$  at  $-135^\circ\text{C}$  in 2-MeTHF with 20, 30, 40 and 50 mmols of TEMPO–H.

| mol      | $k_{\text{obs}} \text{ s}^{-1}$ |          |          | Average  |
|----------|---------------------------------|----------|----------|----------|
|          | Trial 1                         | Trial 2  | Trial 3  |          |
| 2.00E-02 | 1.26E-03                        | 1.41E-03 | 1.55E-03 | 1.41E-03 |
| 3.00E-02 | 2.27E-03                        | 2.61E-03 | 2.24E-03 | 2.37E-03 |
| 4.00E-02 | 3.01E-03                        | 3.49E-03 | 3.28E-03 | 3.26E-03 |
| 5.00E-02 | 4.01E-03                        | 4.45E-03 | 4.29E-03 | 4.25E-03 |

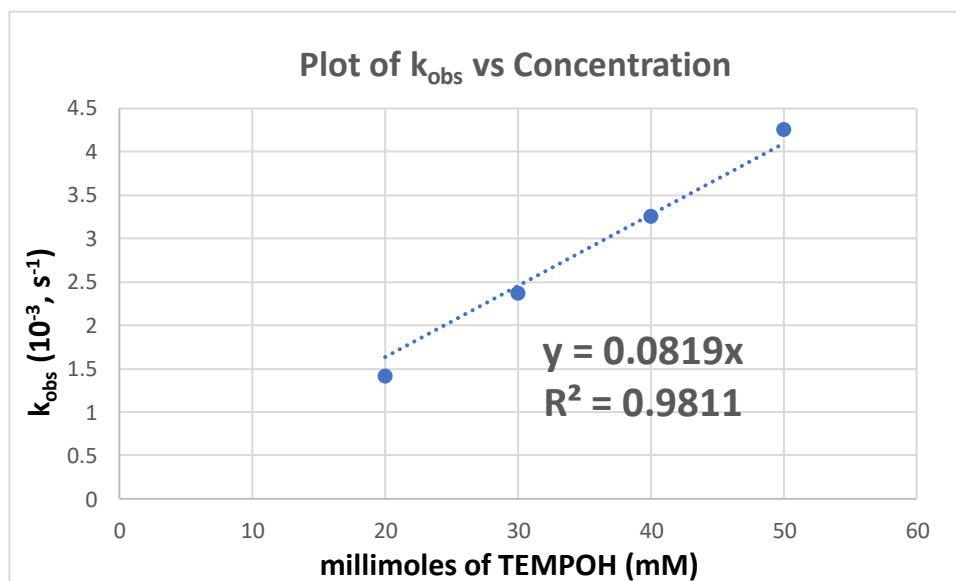

**Figure S11.** Plot {for  $[\mathbf{2} \cdot \text{O}_2]\text{B}(\text{C}_6\text{F}_5)_4$ } of pseudo first order rate constants ( $k_{\text{obs}}$ ) against the TEMPO–H concentrations; from the slope of the linear fit, the second-order rate constant is calculated to be  $0.82 \times 10^{-1} \text{ M}^{-1} \text{ s}^{-1}$ .

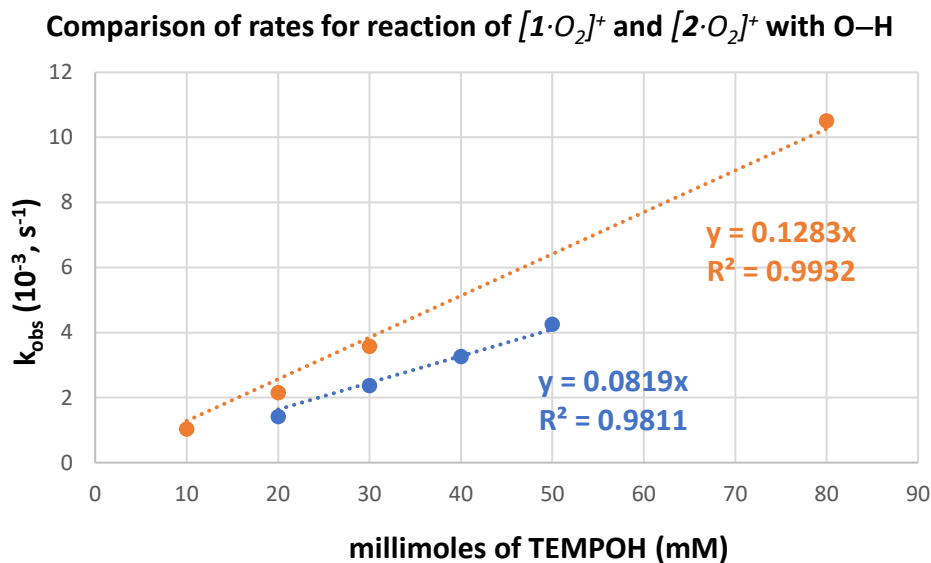

**Figure S12.** Comparative analysis of rates of hydrogen atom abstraction reactivity with TEMPO–H (2-MeTHF at –135 °C):  $k_2 = 1.28 \times 10^{-1} \text{ M}^{-1} \text{ s}^{-1}$ , in orange,  $[1\cdot O_2]B(C_6F_5)_4$ ;  $0.82 \times 10^{-1} \text{ M}^{-1} \text{ s}^{-1}$ , in blue,  $[2\cdot O_2]B(C_6F_5)_4$ .

## 10. Product Analyses

### A) Quantification of Hydroperoxo Product

The formation (and the yield) of the final cupric hydroperoxo product was further verified by acidification (i.e. liberation of  $H_2O_2$ ) and subsequent quantification of triiodide ( $I_3^-$ ) formed when treated with a MeCN-saturated solution of  $I^-$ . In a typical experiment, 2.5 ml of a 0.80 mM solution of  $[1]B(C_6F_5)_4$  in 2-MeTHF was taken in a cuvette in the glovebox, and oxygenated at –135 °C. The superoxide generated was mixed with TEMPO–H and at the end of the HAA reaction, 1 equivalent of  $HCl\cdot Et_2O$  (2.0 M, Sigma Aldrich) was added via a syringe (to release  $H_2O_2$ ) until complete disappearance of the hydroperoxide features is noted via UV-Vis spectroscopy. Then, 150  $\mu\text{L}$  of solution in the cuvette was transferred into a cuvette with saturated NaI solution in MeCN (2.0 mL) at RT. This mixture was allowed to incubate for 6 mins. The UV-Vis spectrum of this solution was then taken showing the formation of triiodide ( $I_3^-$ ) at 362 nm (Figure S13). The

yield of  $\text{H}_2\text{O}_2$  was found to be 94% when compared with standard series of solutions (see Figure S14).<sup>22</sup> Note: (1) Without acidification,  $[\mathbf{1}\cdot\text{O}_2]\text{B}(\text{C}_6\text{F}_5)_4$  by itself did not show any presence of peroxide formation upon warming and (2) the protonation of the cupric superoxide complex  $[\mathbf{1}\cdot\text{O}_2]\text{B}(\text{C}_6\text{F}_5)_4$  resulted in 43% yield of  $\text{H}_2\text{O}_2$ , consistent with previous observation of disproportionation of protonated superoxo radical:  $2\text{H}^+ + 2\text{O}_2^{\cdot-} \rightarrow \text{H}_2\text{O}_2 + \text{O}_2$ .<sup>22</sup>

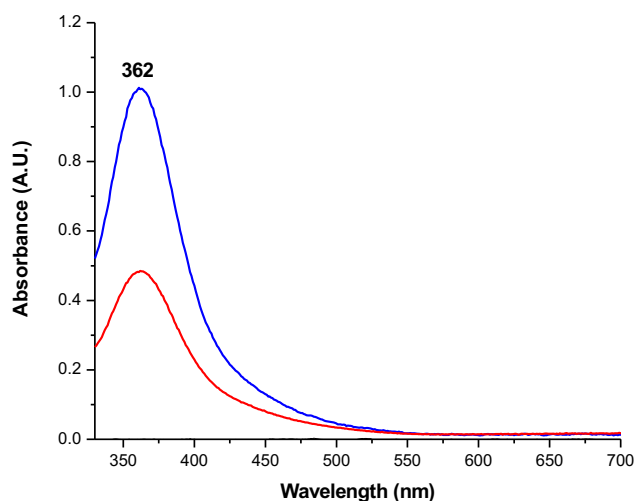

**Figure S13.** UV-Vis spectra of  $\text{I}_3^-$  generated ( $\lambda_{\text{max}} = 362 \text{ nm}$ ) from the released  $\text{H}_2\text{O}_2$  upon addition of 1 equiv of  $\text{H}^+$  to the reaction mixture containing  $[\mathbf{1}\cdot\text{OOH}]\text{B}(\text{C}_6\text{F}_5)_4$  species, in blue and  $[\mathbf{1}\cdot\text{O}_2]\text{B}(\text{C}_6\text{F}_5)_4$  complex (control), in red.

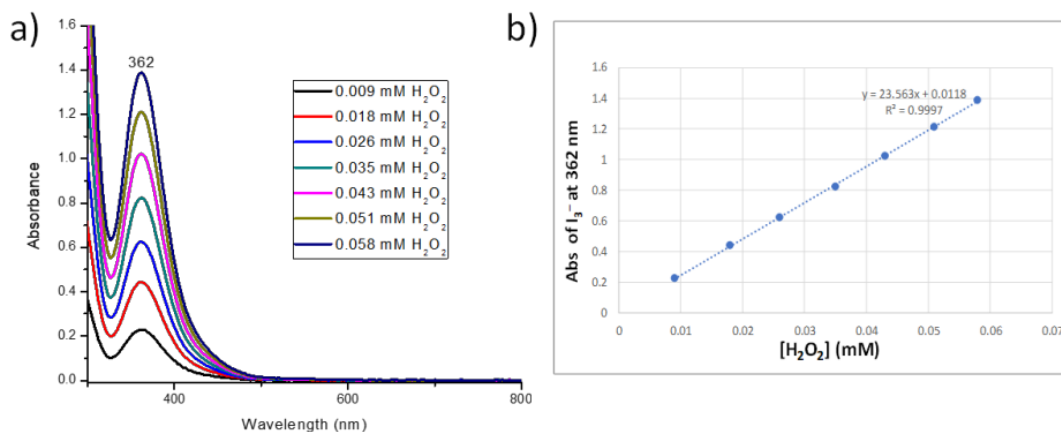

**Figure S14.** UV-Visible spectrum of triiodide ( $I_3^-$ ) at 362 nm obtained on spectrophotometric titration of  $I_3^-$  with  $H_2O_2$  solutions to generate b) the standard linear curve. See *J. Am. Chem. Soc.* **2018**, *140*, 9042-9045 for details.<sup>22</sup>

## B) EPR Data

In the glovebox, a 500 ml of 0.8 mM solution of  $[1]B(C_6F_5)_4$  in 4:1 (v/v) 2-MeTHF:THF was prepared, transferred to an EPR tube and capped with tightfitting septa. The sample tube was placed in a cold bath (4:1(v/v) 2-MeTHF:THF/liq  $N_2$  ( $-145^\circ C$ )) and oxygenated by bubbling dioxygen via a fine-point needle. The oxygenated sample was maintained at  $-145^\circ C$  for  $\sim 35$  mins and after generation of  $[1 \cdot O_2]B(C_6F_5)_4$ , excess TEMPO-H was added to generate TEMPO radical and  $[1 \cdot OOH]B(C_6F_5)_4$ . Then, the sample tube was frozen in liquid  $N_2$ . Figure 4 in the main manuscript depicts the EPR data obtained. Generations of  $[1 \cdot OOH]B(C_6F_5)_4$  and TEMPO radical are demonstrated by formation of the reverse-axial  $Cu^{II}$  features and the sharp radical peak respectively. For quantifying the amount of TEMPO radical formed from this reaction, four different solutions (0.5 mM, 1.0 mM, 1.5 mM, 2.0 mM) of pre-sublimed TEMPO radical in 2-MeTHF were used as standards and the integrated areas corresponding to the  $Cu^{II}$ -spins were noted. The amount of TEMPO radical in solution is estimated to be 91%. Similarly, the amount of



$[\mathbf{1}\cdot\text{OOH}]\text{B}(\text{C}_6\text{F}_5)_4$  species in solution (when compared with the integrated area of an authentic 1.0 mM methanolic solution of  $\text{Cu}^{\text{II}}$ -salt,  $[\mathbf{2}\cdot\text{Cl}]^+$ , is estimated to be 97%.

Simulation of the EPR data of  $[\mathbf{1}\cdot\text{OOH}]\text{B}(\text{C}_6\text{F}_5)_4$  was challenged by the presence of  $\text{TEMPO}^\bullet$  and by the peak widths. The  $g_{zz}$  and  $A_{zz}(\text{Cu})$  values could be clearly seen and were fit to be 2.23 and 370 MHz, respectively. The  $g_{xx}$ ,  $g_{yy}$ ,  $A_{xx}(\text{Cu})$ , and  $A_{yy}(\text{Cu})$  values were obscured. The parameters from fitting routines of EasySpin 5.2.3 were  $g_{xx}$  2.02,  $g_{yy}$  2.11,  $A_{xx}(\text{Cu})$  152 MHz, and  $A_{yy}(\text{Cu})$  168 MHz. The simulated spectrum is overlaid with the data in Figure S15.

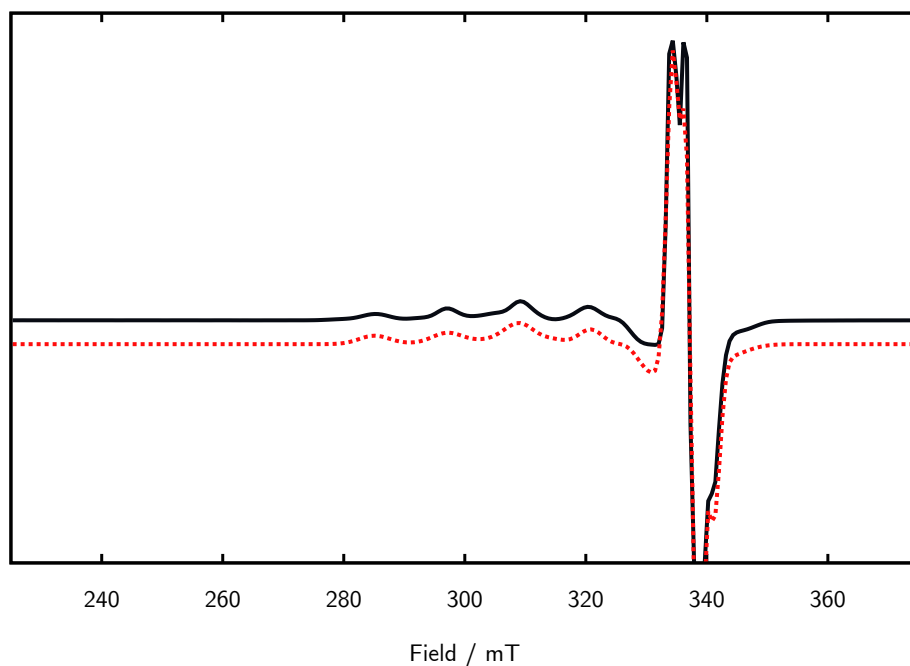

**Figure S15.** The EPR data could be simulated with EasySpin using best fit copper(II) parameters of  $g = [2.2303, 2.1143, 2.0185]$ ,  $A = [370.3, 167.9, 152.0]$  for Nucs = 'Cu',  $lw = 4.24$ ,  $g\text{Strain} = [0.0278, 0.0244, 0.0407]$ . The EasySpin parameters for  $\text{TEMPO}^\bullet$  were  $g = [2.0082, 2.0052, 2.0022]$ ,  $A = [16.8, 20.4, 95.7]$  for Nucs = ' $^{14}\text{N}$ ',  $lw = 1.85$ ,  $g\text{Strain} = [0.0049, 0.0090, 0.0077]$ .

## 11. References

1. Liang, H. C.; Kim, E.; Incarvito, C. D.; Rheingold, A. L.; Karlin, K. D. A Bis-Acetonitrile Two-Coordinate Copper(I) Complex: Synthesis and Characterization of Highly Soluble  $B(C_6F_5)_4^-$  Salts of  $[Cu(MeCN)_2]^+$  and  $[Cu(MeCN)_4]^+$ . *Inorganic Chemistry* **2002**, *41*, 2209-2212.
2. Würtele, C.; Gaoutchenova, E.; Harms, K.; Holthausen, M. C.; Sundermeyer, J.; Schindler, S. Crystallographic characterization of a synthetic 1:1 end-on copper dioxygen adduct complex. *Angewandte Chemie International Edition* **2006**, *45*, 3867-3869.
3. Wittmann, H.; Raab, V.; Schorm, A.; Plackmeyer, J.; Sundermeyer, J. Complexes of Manganese, Iron, Zinc, and Molybdenum with a Superbasic Tris (guanidine) Derivative of Tris (2-ethylamino) amine (Tren) as a Tripod Ligand. *European Journal of Inorganic Chemistry* **2001**, *2001*, 1937-1948.
4. Schatz, M.; Raab, V.; Foxon, S. P.; Brehm, G.; Schneider, S.; Reiher, M.; Holthausen, M. C.; Sundermeyer, J.; Schindler, S. Combined Spectroscopic and Theoretical Evidence for a Persistent End-On Copper Superoxo Complex. *Angewandte Chemie International Edition* **2004**, *43*, 4360-4363.
5. Maiti, D.; Lee, D. H.; Gaoutchenova, K.; Würtele, C.; Holthausen, M. C.; Narducci Sarjeant, A. A.; Sundermeyer, J.; Schindler, S.; Karlin, K. D. Reactions of a Copper (II) Superoxo Complex Lead to C–H and O–H Substrate Oxygenation: Modeling Copper-Monooxygenase C–H Hydroxylation. *Angewandte Chemie International Edition* **2008**, *47*, 82-85.
6. Maiti, D.; Fry, H. C.; Woertink, J. S.; Vance, M. A.; Solomon, E. I.; Karlin, K. D. A 1: 1 Copper–Dioxygen Adduct is an End-on Bound Superoxo Copper (II) Complex which Undergoes Oxygenation Reactions with Phenols. *Journal of the American Chemical Society* **2007**, *129*, 264-265.
7. Neuba, A.; Rohrmüller, M.; Hölscher, R.; Schmidt, W. G.; Henkel, G. A panel of peralkylated sulfur–guanidine type bases: Novel pro-ligands for use in biomimetic coordination chemistry. *Inorganica Chimica Acta* **2015**, *430*, 225-238.
8. Mader, E. A.; Davidson, E. R.; Mayer, J. M. Large Ground-State Entropy Changes for Hydrogen Atom Transfer Reactions of Iron Complexes. *Journal of the American Chemical Society* **2007**, *129*, 5153-5166.
9. Wu, A.; Mader, E. A.; Datta, A.; Hrovat, D. A.; Borden, W. T.; Mayer, J. M. Nitroxyl Radical Plus Hydroxylamine Pseudo Self-Exchange Reactions: Tunneling in Hydrogen Atom Transfer. *Journal of the American Chemical Society* **2009**, *131*, 11985-11997.
10. Fulmer, G. R.; Miller, A. J. M.; Sherden, N. H.; Gottlieb, H. E.; Nudelman, A.; Stoltz, B. M.; Bercaw, J. E.; Goldberg, K. I. NMR Chemical Shifts of Trace Impurities: Common Laboratory Solvents, Organics, and Gases in Deuterated Solvents Relevant to the Organometallic Chemist. *Organometallics* **2010**, *29*, 2176-2179.
11. Tenderholt, A.; Hedman, B.; Hodgson, K. O. PySpline: A Modern, Cross-Platform Program for the Processing of Raw Averaged XAS Edge and EXAFS Data. *AIP Conference Proceedings* **2007**, *882*, 105-107.

12. Rehr, J. J.; Albers, R. C. Theoretical approaches to x-ray absorption fine structure. *Reviews of Modern Physics* **2000**, *72*, 621-654.
13. Neese, F. Software update: the ORCA program system, version 4.0. *WIREs Computational Molecular Science* **2018**, *8*, e1327.
14. Neese, F.; Wennmohs, F.; Hansen, A.; Becker, U. Efficient, approximate and parallel Hartree-Fock and hybrid DFT calculations. A 'chain-of-spheres' algorithm for the Hartree-Fock exchange. *Chemical Physics* **2009**, *356*, 98.
15. Becke, A. D. Density-functional exchange-energy approximation with correct asymptotic behavior. *Physical Review A* **1988**, *38*, 3098-3100.
16. Lee, C.; Yang, W.; Parr, R. G. Development of the Colle-Salvetti correlation-energy formula into a functional of the electron density. *Physical Review B* **1988**, *37*, 785-789.
17. Grimme, S.; Ehrlich, S.; Goerigk, L. Effect of the damping function in dispersion corrected density functional theory. *Journal of Computational Chemistry* **2011**, *32*, 1456-1465.
18. Grimme, S.; Antony, J.; Ehrlich, S.; Krieg, H. A consistent and accurate ab initio parametrization of density functional dispersion correction (DFT-D) for the 94 elements H-Pu. *The Journal of Chemical Physics* **2010**, *132*, 154104.
19. Weigend, F.; Ahlrichs, R. Balanced basis sets of split valence, triple zeta valence and quadruple zeta valence quality for H to Rn: Design and assessment of accuracy. *Physical Chemistry Chemical Physics* **2005**, *7*, 3297-3305.
20. Weigend, F. Accurate Coulomb-fitting basis sets for H to Rn. *Physical Chemistry Chemical Physics* **2006**, *8*, 1057-1065.
21. Barone, V.; Cossi, M. Quantum Calculation of Molecular Energies and Energy Gradients in Solution by a Conductor Solvent Model. *The Journal of Physical Chemistry A* **1998**, *102*, 1995-2001.
22. Bhadra, M.; Lee, J. Y. C.; Cowley, R. E.; Kim, S.; Siegler, M. A.; Solomon, E. I.; Karlin, K. D. Intramolecular hydrogen bonding enhances stability and reactivity of mononuclear cupric superoxide complexes. *Journal of the American Chemical Society* **2018**, *140*, 9042-9045.
